# Supplementary material
Source: ML conference proceedings conference paper supplement (https://openreview.net/forum?id=1xzqz73hvL)
Supplement: supplementary_material [file attachment]

## A PROOFS FOR SECTION 3

**Observation 1.** *The model shift in the surrogate-to-target model is equivalent to the covariance shift model (Mallinar et al., 2024). Formally, given  $\beta_\star \in \mathbb{R}^p$  and the covariance matrix  $\Sigma_t \in \mathbb{R}^{p \times p}$ , there exists a unique  $\beta^s \in \mathbb{R}^p$  such that the risk of the surrogate-to-target problem  $\mathcal{R}(\beta^{s2t})$  with  $(\beta_\star, \beta^s, \Sigma_t)$  is equivalent to the risk of the covariance shift model  $\mathcal{R}^{cs}(\hat{\beta})$  with  $(\beta_\star, \Sigma_s, \Sigma_t)$  for any  $\Sigma_s \in \mathbb{R}^{p \times p}$  that is jointly diagonalizable with  $\Sigma_t$ .*

*Proof.* By Observation 2, we assume that  $\Sigma_t$  and  $\Sigma_s$  are diagonal matrices. As  $\Sigma_t$  and  $\Sigma_s$  are jointly diagonalizable, there exists a unique diagonal matrix  $A \in \mathbb{R}^{p \times p}$  such that

$$\Sigma_s = A^\top \Sigma_t A.$$

Then, consider the model shift discussed in Section 3. Take the case where  $\beta^s = A\beta_\star$  and labels are generated as  $y = \mathbf{x}^\top \beta^s + z$ , where  $\mathbf{x} \sim \mathcal{N}(0, \Sigma_t)$  and  $z \sim \mathcal{N}(0, \sigma_t^2)$ . This is equivalent to the case where  $y = (\mathbf{x}^\top A)\beta_\star + z = \bar{\mathbf{x}}^\top \beta_\star + z$  such that  $\mathbf{x} \sim \mathcal{N}(0, \Sigma_s)$  and  $z \sim \mathcal{N}(0, \sigma_t^2)$ . Note that (i) the transformed inputs and the labels are identical in both scenarios, and (ii) the estimators are computed in the same way. Thus, it follows that the risks  $\mathcal{R}(\beta^{s2t})$  and  $\mathcal{R}^{cs}(\hat{\beta})$  are equivalent. The other way follows from an almost identical argument.  $\square$

**Observation 2.** *For any covariance matrix  $\Sigma \in \mathbb{R}^{p \times p}$ , there exists an orthonormal matrix  $U \in \mathbb{R}^{p \times p}$  such that the transformation of  $\mathbf{x} \rightarrow U^\top \mathbf{x}$  and  $\beta \rightarrow U^\top \beta$  does not affect the labels  $\mathbf{y}$  but ensures that the covariance matrix is diagonal.*

*Proof.* Since the covariance matrix  $\Sigma$  is PSD, its unit-norm eigenvectors are orthogonal. Consider the matrix  $U$  whose columns are the eigenvectors of  $\Sigma$ . Then,  $\Sigma$  can be expressed as  $\Sigma = U\Lambda U^\top$ , where  $\Lambda$  is the diagonal matrix containing the eigenvalues of  $\Sigma$ . Consider now the transformation

$$\mathbf{z} = U^\top \mathbf{x} \implies \mathbb{E}[\mathbf{z}\mathbf{z}^\top] = \mathbb{E}[U^\top \mathbf{x}\mathbf{x}^\top U] = U^\top \mathbb{E}[\mathbf{x}\mathbf{x}^\top] U = U^\top U \Lambda U^\top U = \Lambda.$$

In this way, the covariance matrix is diagonalized. Thus, the transformation  $(\mathbf{x}, \beta_\star) \rightarrow (U^\top \mathbf{x}, U^\top \beta_\star)$  works as intended since the labels are preserved.  $\square$

**Definition 1.** *Let  $\kappa_t = p/n > 1$  and  $\tau_t \in \mathbb{R}$  be the unique solution of the following equation*

$$\kappa_t^{-1} = \frac{1}{p} \text{tr}((\Sigma_t + \tau_t \mathbf{I})^{-1} \Sigma_t). \quad (7)$$

*Define the function  $\gamma_t : \mathbb{R}^p \rightarrow \mathbb{R}$  as*

$$\gamma_t^2(\beta^s) = \kappa_t \left( \sigma_s^2 + \mathbb{E}_{(\mathbf{x}, \mathbf{y}^s) \sim \mathcal{D}_t(\beta^s)} [\|\Sigma_t^{1/2}(\beta^{s2t} - \beta^s)\|_2^2] \right). \quad (8)$$

*Then, the asymptotic risk estimate is defined as*

$$\begin{aligned} \bar{\mathcal{R}}_{\kappa_t, \sigma_t}^{s2t}(\Sigma_t, \beta_\star, \beta^s) &:= (\beta^s - \beta_\star)^\top \theta_1^\top \Sigma_t \theta_1 (\beta^s - \beta_\star) + \gamma_t^2(\beta^s) \mathbb{E}_{\mathbf{g}_t}[\theta_2^\top \Sigma_t \theta_2] \\ &\quad + \beta_\star^\top (\mathbf{I} - \theta_1)^\top \Sigma_t (\mathbf{I} - \theta_1) \beta_\star - 2\beta_\star^\top (\mathbf{I} - \theta_1)^\top \Sigma_t \theta_1 (\beta^s - \beta_\star), \end{aligned} \quad (9)$$

*where  $\theta_1 := (\Sigma_t + \tau_t \mathbf{I})^{-1} \Sigma_t$ ,  $\theta_2 := (\Sigma_t + \tau_t \mathbf{I})^{-1} \Sigma_t^{1/2} \frac{\mathbf{g}_t}{\sqrt{p}}$ , and  $\mathbf{g}_t \sim \mathcal{N}(\mathbf{0}, \mathbf{I}_p)$ .*

**Theorem 1.** *Suppose that, for some constant  $M_t > 1$ , we have  $1/M_t \leq \kappa_t$ ,  $\sigma_t^2 \leq M_t$  and  $\|\Sigma_t\|_{op}, \|\Sigma_t^{-1}\|_{op} \leq M_t$ . Recall from (5) that  $\mathcal{R}(\beta^{s2t})$  represents the risk of the surrogate-to-target model given  $\beta^s$ . Then, there exists a constant  $C = C(M_t)$  such that, for any  $\varepsilon \in (0, 1/2]$ , the following holds with  $R + 1 < M_t$ :*

$$\sup_{\beta_\star, \beta^s \in \mathcal{B}_p(R)} \mathbb{P}(|\mathcal{R}(\beta^{s2t}) - \bar{\mathcal{R}}_{\kappa_t, \sigma_t}^{s2t}(\Sigma_t, \beta_\star, \beta^s)| \geq \varepsilon) \leq C p e^{-p\varepsilon^4/C}. \quad (10)$$

*Proof.* Even though the claim readily follows from Theorem 2, we give a proof for the sake of completeness.

Define a function  $f_1 : \mathbb{R}^p \rightarrow \mathbb{R}$  as  $f_1(\mathbf{x}) = \|\Sigma_t^{1/2}(\mathbf{x} - \beta_\star)\|_2^2$ . The gradient of this function is

$$\|\nabla f_1(\mathbf{x})\|_2 = \|2\Sigma_t(\mathbf{x} - \beta_\star)\|_2 \leq 2\|\Sigma_t\|_{op} \|\mathbf{x} - \beta_\star\|_2.$$

Using Corollary 2, there exists an event  $E$  with  $\mathbb{P}(E^c) \leq C_t e^{-p/C_t}$  where  $C_t = C_t(M_t, \frac{M_t-R}{2})$  (with the definition of  $M_t$  in Corollary 2), such that  $f_1(\boldsymbol{\beta}^{s2t})$  is  $2M_t^2$ -Lipschitz if  $\boldsymbol{\beta}_*, \boldsymbol{\beta}^s \in \mathbf{B}_p(R)$ . Applying Theorem 3 on the target model, there exists a constant  $\tilde{C}_s = \tilde{C}_s(M_t)$  such that for any  $\varepsilon \in (0, 1/2]$ , we obtain

$$\sup_{\boldsymbol{\beta}^s \in \mathbf{B}(\frac{M_t+R}{2})} \mathbb{P} \left( \left| f(\boldsymbol{\beta}^{s2t}) - \mathbb{E}_{\mathbf{g}_t} [f(X_{\kappa_t, \sigma_t^2}^t(\boldsymbol{\Sigma}_t, \boldsymbol{\beta}^s, \mathbf{g}_t))] \right| \geq \varepsilon \right) \leq C p e^{-p\varepsilon^4/C}, \quad (13)$$

where  $f(\boldsymbol{\beta}^{s2t}) = \mathcal{R}(\boldsymbol{\beta}^{s2t})$  and

$$X_{\kappa_t, \sigma_t^2}^t(\boldsymbol{\Sigma}_t, \boldsymbol{\beta}^s, \mathbf{g}_t) = (\boldsymbol{\Sigma}_t + \tau_t \mathbf{I})^{-1} \boldsymbol{\Sigma}_t \left[ \boldsymbol{\beta}^s + \frac{\boldsymbol{\Sigma}_t^{-1/2} \gamma_t(\boldsymbol{\beta}^s) \mathbf{g}_t}{\sqrt{p}} \right].$$

Furthermore,

$$\begin{aligned} \mathbb{E}_{\mathbf{g}_t} \left[ f(X_{\kappa_t, \sigma_t^2}^t(\boldsymbol{\Sigma}_t, \boldsymbol{\beta}^s, \mathbf{g}_t)) \right] &= \mathbb{E}_{\mathbf{g}_t} \left[ \|\boldsymbol{\Sigma}_t^{1/2} (\boldsymbol{\theta}_1(\boldsymbol{\beta}^s - \boldsymbol{\beta}_*) - (\mathbf{I} - \boldsymbol{\theta}_1)\boldsymbol{\beta}_* + \boldsymbol{\theta}_2 \gamma_t(\boldsymbol{\beta}^s))\|_2^2 \right] \\ &= (\boldsymbol{\beta}^s - \boldsymbol{\beta}_*)^\top \boldsymbol{\theta}_1^\top \boldsymbol{\Sigma}_t \boldsymbol{\theta}_1 (\boldsymbol{\beta}^s - \boldsymbol{\beta}_*) + \gamma_t^2(\boldsymbol{\beta}^s) \mathbb{E}_{\mathbf{g}_t} [\boldsymbol{\theta}_2^\top \boldsymbol{\Sigma}_t \boldsymbol{\theta}_2] \\ &\quad + \boldsymbol{\beta}_*^\top (\mathbf{I} - \boldsymbol{\theta}_1)^\top \boldsymbol{\Sigma}_t (\mathbf{I} - \boldsymbol{\theta}_1) \boldsymbol{\beta}_* - 2\boldsymbol{\beta}_*^\top (\mathbf{I} - \boldsymbol{\theta}_1)^\top \boldsymbol{\Sigma}_t \boldsymbol{\theta}_1 (\boldsymbol{\beta}^s - \boldsymbol{\beta}_*), \end{aligned} \quad (14)$$

where  $\boldsymbol{\theta}_1 := (\boldsymbol{\Sigma}_t + \tau_t \mathbf{I})^{-1} \boldsymbol{\Sigma}_t$  and  $\boldsymbol{\theta}_2 := (\boldsymbol{\Sigma}_t + \tau_t \mathbf{I})^{-1} \boldsymbol{\Sigma}_t^{1/2} \frac{\mathbf{g}_t}{\sqrt{p}}$ . This completes the proof.  $\square$

**Proposition 1.** Let  $\Omega = \frac{\text{tr}(\boldsymbol{\Sigma}_t^2 (\boldsymbol{\Sigma}_t + \tau_t \mathbf{I})^{-2})}{n}$ . The optimal surrogate  $\boldsymbol{\beta}^s$  minimizing the asymptotic risk in (9) is

$$\boldsymbol{\beta}^{s*} = \left( (\boldsymbol{\Sigma}_t + \tau_t \mathbf{I})^{-1} \boldsymbol{\Sigma}_t + \frac{\Omega \tau_t^2}{1 - \Omega} \boldsymbol{\Sigma}_t^{-1} (\boldsymbol{\Sigma}_t + \tau_t \mathbf{I})^{-1} \right)^{-1} \boldsymbol{\beta}_*.$$

*Proof.* We have that

$$\begin{aligned} \mathbb{E}_{\mathbf{g}_t} \left[ f(X_{\kappa_t, \sigma_t^2}^t(\boldsymbol{\Sigma}_t, \boldsymbol{\beta}^s, \mathbf{g}_t)) \right] &= \mathbb{E}_{\mathbf{g}_t} \left[ \|\boldsymbol{\Sigma}_t^{1/2} (\boldsymbol{\theta}_1(\boldsymbol{\beta}^s - \boldsymbol{\beta}_*) - (\mathbf{I} - \boldsymbol{\theta}_1)\boldsymbol{\beta}_* + \boldsymbol{\theta}_2 \gamma_t(\boldsymbol{\beta}^s))\|_2^2 \right] \\ &= (\boldsymbol{\beta}^s - \boldsymbol{\beta}_*)^\top \boldsymbol{\theta}_1^\top \boldsymbol{\Sigma}_t \boldsymbol{\theta}_1 (\boldsymbol{\beta}^s - \boldsymbol{\beta}_*) + \gamma_t^2(\boldsymbol{\beta}^s) \mathbb{E}_{\mathbf{g}_t} [\boldsymbol{\theta}_2^\top \boldsymbol{\Sigma}_t \boldsymbol{\theta}_2] \\ &\quad + \boldsymbol{\beta}_*^\top (\mathbf{I} - \boldsymbol{\theta}_1)^\top \boldsymbol{\Sigma}_t (\mathbf{I} - \boldsymbol{\theta}_1) \boldsymbol{\beta}_* - 2\boldsymbol{\beta}_*^\top (\mathbf{I} - \boldsymbol{\theta}_1)^\top \boldsymbol{\Sigma}_t \boldsymbol{\theta}_1 (\boldsymbol{\beta}^s - \boldsymbol{\beta}_*), \end{aligned}$$

where  $\boldsymbol{\theta}_1 := (\boldsymbol{\Sigma}_t + \tau_t \mathbf{I})^{-1} \boldsymbol{\Sigma}_t$ ,  $\boldsymbol{\theta}_2 := (\boldsymbol{\Sigma}_t + \tau_t \mathbf{I})^{-1} \boldsymbol{\Sigma}_t^{1/2} \frac{\mathbf{g}_t}{\sqrt{p}}$ , and

$$\gamma_t^2(\boldsymbol{\beta}^s) := \kappa_t \frac{\sigma_t^2 + \tau_t^2 \|(\boldsymbol{\Sigma}_t + \tau_t \mathbf{I})^{-1} \boldsymbol{\Sigma}_t^{1/2} \boldsymbol{\beta}^s\|_2^2}{1 - \frac{1}{n} \text{tr}((\boldsymbol{\Sigma}_t + \tau_t \mathbf{I})^{-2} \boldsymbol{\Sigma}_t^2)}.$$

In order to optimize this with respect to  $\boldsymbol{\beta}^s$ , let's take the derivative:

$$\begin{aligned} &\frac{\partial}{\partial \boldsymbol{\beta}^s} \mathbb{E}_{\mathbf{g}_t} \left[ f(X_{\kappa_t, \sigma_t^2}^t(\boldsymbol{\Sigma}_t, \boldsymbol{\beta}^s, \mathbf{g}_t)) \right] \\ &= 2\boldsymbol{\theta}_1^\top \boldsymbol{\Sigma}_t \boldsymbol{\theta}_1 (\boldsymbol{\beta}^s - \boldsymbol{\beta}_*) - 2\boldsymbol{\theta}_1^\top \boldsymbol{\Sigma}_t (\mathbf{I} - \boldsymbol{\theta}_1) \boldsymbol{\beta}_* + 2 \frac{\kappa_t \tau_t^2}{1 - \Omega} \boldsymbol{\Sigma}_t (\boldsymbol{\Sigma}_t + \tau_t \mathbf{I})^{-2} \boldsymbol{\beta}^s \frac{\text{tr}(\boldsymbol{\Sigma}_t^2 (\boldsymbol{\Sigma}_t + \tau_t \mathbf{I})^{-2})}{p} \\ &= 2\boldsymbol{\theta}_1^\top \boldsymbol{\Sigma}_t \boldsymbol{\theta}_1 \boldsymbol{\beta}^s - 2\boldsymbol{\Sigma}_t \boldsymbol{\theta}_1 \boldsymbol{\beta}_* + 2 \frac{\kappa_t \tau_t^2}{1 - \Omega} \boldsymbol{\Sigma}_t (\boldsymbol{\Sigma}_t + \tau_t \mathbf{I})^{-2} \boldsymbol{\beta}^s \frac{\text{tr}(\boldsymbol{\Sigma}_t^2 (\boldsymbol{\Sigma}_t + \tau_t \mathbf{I})^{-2})}{p} \\ &= 2\boldsymbol{\theta}_1^\top \boldsymbol{\Sigma}_t \boldsymbol{\theta}_1 \boldsymbol{\beta}^s - 2\boldsymbol{\Sigma}_t \boldsymbol{\theta}_1 \boldsymbol{\beta}_* + 2 \frac{\kappa_t \tau_t^2}{1 - \Omega} \boldsymbol{\Sigma}_t (\boldsymbol{\Sigma}_t + \tau_t \mathbf{I})^{-2} \boldsymbol{\beta}^s \frac{n\Omega}{p} \\ &\implies \boldsymbol{\theta}_1^\top \boldsymbol{\Sigma}_t \boldsymbol{\theta}_1 \boldsymbol{\beta}^{s*} - \boldsymbol{\Sigma}_t \boldsymbol{\theta}_1 \boldsymbol{\beta}_* + \frac{\Omega \tau_t^2}{1 - \Omega} \boldsymbol{\Sigma}_t (\boldsymbol{\Sigma}_t + \tau_t \mathbf{I})^{-2} \boldsymbol{\beta}^{s*} = 0 \\ &\implies (\boldsymbol{\theta}_1^\top \boldsymbol{\Sigma}_t \boldsymbol{\theta}_1 + \frac{\Omega \tau_t^2}{1 - \Omega} \boldsymbol{\theta}_1 (\boldsymbol{\Sigma}_t + \tau_t \mathbf{I})^{-1}) \boldsymbol{\beta}^{s*} = \boldsymbol{\Sigma}_t \boldsymbol{\theta}_1 \boldsymbol{\beta}_* \end{aligned}$$

Hence, the claimed result follows.  $\square$

**Corollary 1.** Without loss of generality, suppose that  $\Sigma_t$  is diagonal.<sup>2</sup> Let  $(\lambda_i)_{i=1}^p$  be the eigenvalues of  $\Sigma_t$  in non-increasing order and let  $\zeta_i = \frac{\tau_i}{\lambda_i + \tau_i}$  for  $i \in [p]$ . Then, the following results hold:

1.  $\beta_i^{s*} = (\beta_*)_i \left( (1 - \zeta_i) + \zeta_i \frac{\Omega}{1 - \Omega} \frac{\zeta_i}{1 - \zeta_i} \right)^{-1}$  for every  $i \in [p]$ .
2.  $|\beta_i^{s*}| > |(\beta_*)_i|$  if and only if  $1 - \zeta_i > \Omega = \frac{\sum_{j=1}^p (1 - \zeta_j)^2}{\sum_{j=1}^p (1 - \zeta_j)}$  for every  $i \in [p]$ .
3.  $\beta^{s*} = \beta_*$  if and only if the covariance matrix  $\Sigma_t = c\mathbf{I}$  for some  $c \in \mathbb{R}$ .

*Proof.* When the definition of  $\zeta_i$  and  $\Omega$  is plugged in Proposition 1, the first claim is obtained. Using the diagonalization assumption on  $\Sigma_t$ , let's analyze only the  $i$ -th component of the optimal surrogate given in the Proposition 1:

$$\begin{aligned} \beta_i^{s*} &= \frac{1}{\frac{\lambda_i}{\lambda_i + \tau_i} + \frac{\Omega}{1 - \Omega} \frac{\tau_i^2}{\lambda_i(\lambda_i + \tau_i)}} (\beta_*)_i \\ &\iff \beta_i^{s*} = \frac{\frac{\lambda_i}{\lambda_i + \tau_i}}{\left(\frac{\lambda_i}{\lambda_i + \tau_i}\right)^2 + \frac{\Omega}{1 - \Omega} \left(\frac{\tau_i}{\lambda_i + \tau_i}\right)^2} (\beta_*)_i \\ &\iff \beta_i^{s*} = (\beta_*)_i \frac{(1 - \zeta_i)}{(1 - \zeta_i)^2 + \frac{\Omega}{1 - \Omega} \zeta_i^2} \\ &\iff \beta_i^{s*} = (\beta_*)_i \frac{1}{(1 - \zeta_i) + \frac{\Omega}{1 - \Omega} \frac{\zeta_i}{1 - \zeta_i} \zeta_i}. \end{aligned}$$

It's now clear that  $\zeta_i > 1 - \Omega$  if and only if  $|\beta_i^{s*}| < |(\beta_*)_i|$ .

Let's now check when the ratio between them is 1. Algebraic manipulations give:

$$\begin{aligned} \frac{(1 - \zeta_i)}{(1 - \zeta_i)^2 + \frac{\Omega}{1 - \Omega} \zeta_i^2} &= 1 \\ \iff (1 - \zeta_i) - (1 - \zeta_i)^2 &= \frac{\Omega}{1 - \Omega} \zeta_i^2 \\ \iff \zeta_i = 1 - \Omega &\iff 1 - \zeta_i = \Omega \text{ where } \Omega = \frac{\sum_{i=1}^p (1 - \zeta_i)^2}{\sum_{i=1}^p (1 - \zeta_i)}. \end{aligned}$$

This suggests  $\beta^{s*} = \beta_*$  if all  $\zeta_i$ 's are equal, which implies that all  $\lambda_i$ 's are equal. Concluding, the covariance matrix is a multiple of the identity if and only if  $\beta^{s*} = \beta_*$ .  $\square$

**Proposition 2.** Consider the target model in (6), assume that  $\Sigma_t$  is diagonal, and recall the definitions of  $\zeta_i$  and  $\Omega$ . Then, the following results hold:

1. If the mask operation  $\mathcal{M}$  selects all the features that satisfy  $1 - \zeta_i^2 > \Omega$ , then the surrogate-to-target model outperforms the standard target model in the asymptotic risk in (9).
2. Let  $\mathbf{M}$  represent the set of all possible  $\mathcal{M}$ , where  $|\mathbf{M}| = 2^p$ . The optimal  $\mathcal{M}^*$  for the asymptotic risk in (9) within  $\mathbf{M}$  is the one that selects all features satisfying  $1 - \zeta_i^2 > \Omega$ .

*Proof.* For the purposes of analysis, we assume, without loss of generality, that the first  $p_s$  dimensions are selected from  $\beta_*$  in  $\mathcal{M}(\beta_*) = \beta^s \in \mathbb{R}^{p_s}$ . Based on this, we no longer need to have the decreasing order for the corresponding  $\lambda_i$ 's. From the excess test risk formula in Definition 2, we have that

$$\mathcal{R}(\beta^t) = \mathbb{E} \left[ \left( y - \mathbf{x}^\top \beta^t \right)^2 \right] - \sigma_t^2 = \frac{\mathcal{B}(\beta_*) + \sigma_t^2 \Omega}{1 - \Omega}. \quad (15)$$

<sup>2</sup>If not, there exists an orthogonal matrix  $U \in \mathbb{R}^{p \times p}$  s.t.  $U \Sigma_t U^\top$  is diagonal. Then, we can consider the covariance matrix as  $U \Sigma_t U^\top$  and the ground truth parameter as  $U \beta_*$ , which behaves the same as the original parameters, see Observation 2.

Next, we write the excess test risk formula for the surrogate-to-target model with respect to the original ground truth labels:

$$\mathcal{R}(\boldsymbol{\beta}^{s2t}) = \mathbb{E} \left[ (y - \mathbf{x}^\top \boldsymbol{\beta}^{s2t})^2 \right] - \sigma_t^2 = \mathbb{E} \left[ (\boldsymbol{\beta}^{s2t} - \boldsymbol{\beta}_\star)^\top \boldsymbol{\Sigma} (\boldsymbol{\beta}^{s2t} - \boldsymbol{\beta}_\star) \right].$$

Now, consider the zero-padded vector  $\bar{\boldsymbol{\beta}}^s = \begin{bmatrix} \boldsymbol{\beta}^s \\ \mathbf{0}_{p-p_s} \end{bmatrix} \in \mathbb{R}^p$ , and define  $(\bar{\boldsymbol{\beta}}^s)' = \boldsymbol{\beta}_\star - \bar{\boldsymbol{\beta}}^s \in \mathbb{R}^p$  of which the first  $p_s$  dimensions are zero. In this way, we can consider the labels in the second training phase as  $y^s = \mathbf{x}^\top \bar{\boldsymbol{\beta}}^s + z$ , where  $z \sim \mathcal{N}(0, \sigma_t^2)$ . Applying the test risk estimate in Definition 2, we obtain:

$$\mathbb{E} \left[ (y^s - \mathbf{x}^\top \boldsymbol{\beta}^{s2t})^2 \right] = \mathbb{E} \left[ (\boldsymbol{\beta}^{s2t} - \boldsymbol{\beta}^s)^\top \boldsymbol{\Sigma} (\boldsymbol{\beta}^{s2t} - \boldsymbol{\beta}^s) \right] = \frac{\mathcal{B}(\bar{\boldsymbol{\beta}}^s) + \sigma_t^2 \Omega}{1 - \Omega}.$$

We further derive

$$\begin{aligned} \mathbb{E} \left[ (y - \mathbf{x}^\top \boldsymbol{\beta}^{s2t})^2 \right] &= \mathbb{E} \left[ (y^s - \mathbf{x}^\top \boldsymbol{\beta}^{s2t} + \mathbf{x}^\top (\bar{\boldsymbol{\beta}}^s)')^2 \right] \\ &= \mathbb{E} \left[ (y^s - \mathbf{x}^\top \boldsymbol{\beta}^{s2t})^2 \right] - 2\mathbb{E} \left[ (y^s - \mathbf{x}^\top \boldsymbol{\beta}^{s2t}) (\mathbf{x}^\top (\bar{\boldsymbol{\beta}}^s)') \right] + \mathbb{E} \left[ (\mathbf{x}^\top (\bar{\boldsymbol{\beta}}^s)')^2 \right] \\ &\stackrel{(a)}{=} \mathbb{E} \left[ (y^s - \mathbf{x}^\top \boldsymbol{\beta}^{s2t})^2 \right] - 2\mathbb{E} \left[ y^s - \mathbf{x}^\top \boldsymbol{\beta}^{s2t} \right] \underbrace{\mathbb{E} \left[ \mathbf{x}^\top (\bar{\boldsymbol{\beta}}^s)') \right]}_{=0} + \mathbb{E} \left[ (\mathbf{x}^\top (\bar{\boldsymbol{\beta}}^s)')^2 \right] \\ &= \mathbb{E} \left[ (y^s - \mathbf{x}^\top \boldsymbol{\beta}^{s2t})^2 \right] + \mathbb{E} \left[ (\mathbf{x}^\top (\bar{\boldsymbol{\beta}}^s)')^2 \right] \\ &= \mathbb{E} \left[ (y^s - \mathbf{x}^\top \boldsymbol{\beta}^{s2t})^2 \right] + \sum_{i=p_s+1}^p \lambda_i \beta_i^2 \\ &= \frac{\mathcal{B}(\bar{\boldsymbol{\beta}}^s) + \sigma_t^2 \Omega}{1 - \Omega} + \sum_{i=p_s+1}^p \lambda_i \beta_i^2. \end{aligned} \tag{16}$$

where in the above equality (a) follows from the fact that the components  $x_i$  are independent as the covariance matrix is diagonal. Thus, the risk difference between the target and surrogate-to-target models is

$$\begin{aligned} \mathcal{R}(\boldsymbol{\beta}^t) - \mathcal{R}(\boldsymbol{\beta}^{s2t}) &= \frac{\mathcal{B}(\boldsymbol{\beta}_\star) - \mathcal{B}(\bar{\boldsymbol{\beta}}^s)}{1 - \Omega} - \sum_{i=p_s+1}^p \lambda_i \beta_i^2 \\ &= \frac{\sum_{i=p_s+1}^p \lambda_i \zeta_i^2 \beta_i^2}{1 - \Omega} - \sum_{i=p_s+1}^p \lambda_i \beta_i^2. \end{aligned}$$

We observe that each dimension's contribution to the excess test risk can be analyzed individually. Therefore, if

$$\zeta_i^2 > 1 - \Omega, \tag{17}$$

excluding feature  $i$  in the feature selection reduces the overall risk  $\mathcal{R}(\boldsymbol{\beta}^{s2t})$ . Along the same lines, the projection  $\mathcal{M}$  that selects all the features  $i$  that satisfy  $\zeta_i^2 < 1 - \Omega$  minimizes the asymptotic excess test risk.  $\square$

## B PROOFS FOR SECTION 4

**Definition 2** (Omniscient test risk estimate). *Fix  $p > n \geq 1$ . Given a covariance  $\boldsymbol{\Sigma} = \mathbf{U} \text{diag}(\boldsymbol{\lambda}) \mathbf{U}^\top$ ,  $\boldsymbol{\beta}_\star$ , and the noise term  $\sigma$ , set  $\bar{\boldsymbol{\beta}} = \mathbf{U}^\top \boldsymbol{\beta}_\star$  and define  $\tau \in \mathbb{R}$  as the unique non-negative solution of  $n = \sum_{i=1}^p \frac{\lambda_i}{\lambda_i + \tau}$ . Then, the excess test risk estimate is the following:*

$$\mathcal{R}(\hat{\boldsymbol{\beta}}) \approx \mathbb{E}_{\hat{\boldsymbol{\beta}} \sim D(\boldsymbol{\beta}_\star)} \left[ (y - \mathbf{x}^\top \hat{\boldsymbol{\beta}})^2 \right] - \sigma^2 = \frac{\sigma^2 \Omega + \mathcal{B}(\bar{\boldsymbol{\beta}})}{1 - \Omega}, \tag{11}$$

$$\text{where } \zeta_i = \frac{\tau}{\lambda_i + \tau}, \quad \Omega = \frac{1}{n} \sum_{i=1}^p (1 - \zeta_i)^2, \quad \mathcal{B}(\bar{\boldsymbol{\beta}}) = \sum_{i=1}^p \lambda_i \zeta_i^2 \bar{\beta}_i^2.$$

In the following proof, we suppose that the empirical distributions of  $\bar{\beta}$  and  $\lambda$  converge as  $p \rightarrow \infty$  having fixed the ratio  $p/n = \kappa$ . Then, we will prove that the omniscient risk converges to the asymptotic risk defined in (9).

*Proof for the proportional asymptotic case.* Using Theorem 2.3 of Han & Xu (2023), we can estimate  $\hat{\beta}$  as follows:

$$\hat{\beta} = (\Sigma + \tau I)^{-1} \Sigma \left( \beta_{\star} + \frac{\Sigma^{-1/2} \gamma(\beta_{\star}) \mathbf{g}}{\sqrt{p}} \right),$$

where

$$\mathbf{g} \sim \mathcal{N}(0, I_p), \quad \gamma(\beta_{\star})^2 = \kappa \frac{\sigma^2 + \tau^2 \|(\Sigma + \tau I)^{-1} \Sigma^{1/2} \beta_{\star}\|_2^2}{1 - \frac{1}{n} \text{tr}((\Sigma + \tau I)^{-2} \Sigma^2)}, \quad \tau \text{ is the solution to } n = \sum_{i=1}^p \frac{\lambda_i}{\lambda_i + \tau}.$$

Let

$$X_1 = (\Sigma + \tau I)^{-1} \Sigma, \quad X_2 = \frac{(\Sigma + \tau I)^{-1} \Sigma^{1/2} \gamma(\beta_{\star})}{\sqrt{p}}.$$

Using this estimate, we can calculate the excess test risk as

$$\begin{aligned} \mathcal{R}(\hat{\beta}) &= \mathbb{E} \left[ ((X_1 - I) \beta_{\star} + X_2 \mathbf{g})^\top \Sigma ((X_1 - I) \beta_{\star} + X_2 \mathbf{g}) \right] \\ &= \beta_{\star}^\top (X_1 - I)^\top \Sigma (X_1 - I) \beta_{\star} + \mathbb{E} \left[ \mathbf{g}^\top X_2^\top \Sigma X_2 \mathbf{g} \right] \\ &= \beta_{\star}^\top (X_1 - I)^\top \Sigma (X_1 - I) \beta_{\star} + \text{tr} \left( X_2^\top \Sigma X_2 \right). \end{aligned} \quad (18)$$

Then by recalling the eigendecomposition for the covariance matrix  $\Sigma = U \Lambda U^\top$ , we have

$$\begin{aligned} X_1 &= (U \Lambda U^\top + \tau U U^\top)^{-1} U \Lambda U^\top \\ &= U (\Lambda + \tau I)^{-1} U^\top U \Lambda U^\top \\ &= U \text{diag} \left( \frac{\lambda}{\lambda + \tau} \right) U^\top. \end{aligned}$$

Using the diagonalization of  $I$ ,  $X_1 - I$  can now be computed as

$$X_1 - I = U \text{diag} \left( \frac{-\tau}{\lambda + \tau} \right) U^\top.$$

Let's now compute

$$\begin{aligned} \beta_{\star}^\top (X_1 - I)^\top \Sigma (X_1 - I) \beta_{\star} &= \beta_{\star}^\top U \text{diag} \left( \frac{-\tau}{\lambda + \tau} \right) U^\top U \Lambda U^\top U \text{diag} \left( \frac{-\tau}{\lambda + \tau} \right) U^\top \beta_{\star} \\ &= \beta_{\star}^\top U \text{diag} \left( \frac{\lambda \tau^2}{(\lambda + \tau)^2} \right) U^\top \beta_{\star}. \end{aligned}$$

As  $\bar{\beta} = U^\top \beta_{\star}$ , we obtain that the RHS of the previous expression equals

$$\sum_{i=1}^p \frac{\lambda_i \tau^2 \bar{\beta}_i^2}{(\lambda_i + \tau)^2} = \mathcal{B}(\bar{\beta}).$$

Next, we write more compactly the terms  $\text{tr} \left( X_2^\top \Sigma X_2 \right)$  and  $\gamma(\beta_{\star})^2$ . By defining the short-hand notation  $\Omega = \frac{1}{n} \text{tr} \left( (\Sigma + \tau I)^{-2} \Sigma^2 \right) = \frac{1}{n} \sum_{i=1}^p (1 - \zeta_i)^2$ , we have

$$\begin{aligned} \text{tr} \left( X_2^\top \Sigma X_2 \right) &= \frac{\gamma(\beta_{\star})^2}{p} \sum_{i=1}^p \left( \frac{\lambda_i}{\lambda_i + \tau} \right)^2 = \frac{\gamma(\beta_{\star})^2 n \Omega}{p} \\ \gamma(\beta_{\star})^2 &= \kappa \frac{\sigma^2 + \tau^2 \|(\Sigma + \tau I)^{-1} \Sigma^{1/2} \beta_{\star}\|_2^2}{1 - \Omega} = \kappa \frac{\sigma^2 + \sum_{i=1}^p \frac{\lambda_i \tau^2 \bar{\beta}_i^2}{(\lambda_i + \tau)^2}}{1 - \Omega} = \kappa \frac{\sigma^2 + \mathcal{B}(\bar{\beta})}{1 - \Omega}, \end{aligned}$$

where  $\kappa = \frac{p}{n}$ . Hence, putting it all together in (18) gives the desired result.  $\square$

**Proposition 3** (Asymptotic analysis of  $\tau_t$  and  $\Omega$ ). *Let  $\Sigma \in \mathbb{R}^{p \times p}$  be diagonal and  $\Sigma_{i,i} = \lambda_i = i^{-\alpha}$  for  $1 < \alpha$ . If  $\tau_t$  and  $\Omega$  satisfy the equations*

$$\sum_{i=1}^{\infty} \frac{\lambda_i}{\lambda_i + \tau_t} = n, \quad n\Omega = \sum_{i=1}^{\infty} \left( \frac{i^{-\alpha}}{i^{-\alpha} + \tau_t} \right)^2,$$

then the following results hold

$$\begin{aligned} \tau_t &= cn^{-\alpha} (1 + O(n^{-1})), \quad \text{for } c = \left( \frac{\pi}{\alpha \sin(\pi/\alpha)} \right)^\alpha, \\ \Omega &= \frac{\alpha - 1}{\alpha} - O(n^{-1}). \end{aligned} \tag{12}$$

*Proof.* We start with the asymptotic analysis of  $\tau_t$ . Along the same lines as [Simon et al. \(2024\)](#), since  $\frac{i^{-\alpha}}{i^{-\alpha} + \tau_t}$  is a monotonically decreasing function, we have:

$$n = \sum_{i=1}^{\infty} \frac{i^{-\alpha}}{i^{-\alpha} + \tau_t} \leq \int_0^{\infty} \frac{x^{-\alpha}}{x^{-\alpha} + \tau_t} dx = \frac{\pi}{\alpha \sin(\pi/\alpha)} \tau_t^{-1/\alpha}.$$

Furthermore,

$$\frac{\pi}{\alpha \sin(\pi/\alpha)} \tau_t^{-1/\alpha} - 1 = \int_0^{\infty} \frac{x^{-\alpha}}{x^{-\alpha} + \tau_t} dx - 1 \leq \int_1^{\infty} \frac{x^{-\alpha}}{x^{-\alpha} + \tau_t} dx \leq \sum_{i=1}^{\infty} \frac{i^{-\alpha}}{i^{-\alpha} + \tau_t} = n.$$

Hence, combining these two facts gives

$$\begin{aligned} \frac{\pi}{\alpha \sin(\pi/\alpha)} \tau_t^{-1/\alpha} - 1 \leq n \leq \frac{\pi}{\alpha \sin(\pi/\alpha)} \tau_t^{-1/\alpha} \\ \iff \left( \frac{(n+1)\alpha \sin(\pi/\alpha)}{\pi} \right)^{-\alpha} \leq \tau_t \leq \left( \frac{n\alpha \sin(\pi/\alpha)}{\pi} \right)^{-\alpha}, \end{aligned}$$

which leads to the desired result.

Next, we move to the asymptotic analysis of  $\Omega$ . We have that

$$n\Omega = \sum_{i=1}^{\infty} \left( \frac{i^{-\alpha}}{i^{-\alpha} + \tau_t} \right)^2 \leq \int_0^{\infty} \left( \frac{x^{-\alpha}}{x^{-\alpha} + \tau_t} \right)^2 dx = \frac{\pi(\alpha-1)}{\alpha^2 \sin(\pi/\alpha)} \tau_t^{-1/\alpha}.$$

Besides, since the summand is monotonically decreasing, we also have

$$\frac{\pi(\alpha-1)}{\alpha^2 \sin(\pi/\alpha)} \tau_t^{-1/\alpha} - 1 \leq \int_0^{\infty} \left( \frac{x^{-\alpha}}{x^{-\alpha} + \tau_t} \right)^2 dx - 1 \leq \int_1^{\infty} \left( \frac{x^{-\alpha}}{x^{-\alpha} + \tau_t} \right)^2 dx \leq \sum_{i=1}^{\infty} \left( \frac{i^{-\alpha}}{i^{-\alpha} + \tau_t} \right)^2 = n\Omega.$$

Hence,

$$\frac{\pi(\alpha-1)}{\alpha^2 \sin(\pi/\alpha)} \tau_t^{-1/\alpha} - 1 \leq n\Omega \leq \frac{\pi(\alpha-1)}{\alpha^2 \sin(\pi/\alpha)} \tau_t^{-1/\alpha}. \tag{19}$$

By the hypothesis on  $\tau_t$ , we have that

$$\tau_t^{-1/\alpha} = n \frac{\alpha \sin(\pi/\alpha)}{\pi} (1 - O(n^{-1})), \tag{20}$$

and plugging this in (19) gives the desired result.  $\square$

**Proposition 4.** *Set the constants  $C_1 := \frac{\alpha \sin(\pi/\alpha)}{\pi(\alpha-1)^{1/\alpha}}$  and  $C_2 := \frac{\alpha \sin(\pi/\alpha)}{\pi(\sqrt{\alpha}-1)^{1/\alpha}}$  and assume the power-law eigenstructure  $\lambda_i = i^{-\alpha}$  for  $1 < \alpha$ . Then, the indices  $i$  for which  $\zeta_i < 1 - \Omega$  are  $i < nC_1 + O(1)$ ; while the indices  $i$  for which is  $\zeta_i^2 < 1 - \Omega$  are  $i < nC_2 + O(1)$ .*

918 *Proof.* Recall from Proposition 2 that we should identify indices  $i$  which satisfy the condition  $\zeta_i^2 > 1 - \Omega$   
 919 to decide if we're better off not selecting this dimension  $i$  in the surrogate model. Furthermore, Proposition 3  
 920 gives that  $\Omega = \frac{\alpha - 1}{\alpha} - O(n^{-1})$ . Putting these together, we have  
 921

$$\begin{aligned}
 & \zeta_i^2 > 1 - \Omega \\
 & \iff \zeta_i^2 > c' \quad \text{where } c' = \frac{1}{\alpha} + O(n^{-1}) \\
 & \iff \frac{\tau_i^2}{(\tau_i + i^{-\alpha})^2} = \frac{\tau_i^2 i^{2\alpha}}{(\tau_i i^\alpha + 1)^2} > c' \\
 & \iff (1 - c')\tau_i^2 i^{2\alpha} > 2c'\tau_i i^\alpha + c' \\
 & \iff \left( \sqrt{1 - c'}\tau_i i^\alpha - \frac{c'}{\sqrt{1 - c'}} \right)^2 > \frac{c'}{1 - c'} \\
 & \iff i^\alpha > \frac{\sqrt{c'}}{\tau_i(1 - \sqrt{c'})} \\
 & \iff i > \tau_i^{-1/\alpha} \left( \frac{\sqrt{c'}}{1 - \sqrt{c'}} \right)^{1/\alpha}
 \end{aligned}$$

922  
 923  
 924  
 925  
 926  
 927  
 928  
 929  
 930  
 931  
 932  
 933  
 934  
 935  
 936  
 937  
 938 As  $c' = \frac{1}{\alpha} + O(n^{-1})$ , we get  $\left( \frac{\sqrt{c'}}{1 - \sqrt{c'}} \right)^{1/\alpha} = \frac{1}{(\sqrt{\alpha} - 1)^{1/\alpha}}(1 + O(n^{-1}))$ . Incorporating (20), we achieve that

$$\tau_i^{-1/\alpha} \left( \frac{\sqrt{c'}}{1 - \sqrt{c'}} \right)^{1/\alpha} = n \frac{\alpha \sin(\pi/\alpha)}{\pi(\sqrt{\alpha} - 1)^{1/\alpha}} (1 + O(n^{-1})) = nC_2 + O(1).$$

939  
 940  
 941  
 942  
 943 Similarly, by following the same procedure with the initial inequality  $\zeta_i > 1 - \Omega$ , we get

$$\zeta_i > 1 - \Omega \iff i > nC_1 + O(1), \quad \text{where } C_1 = \frac{\alpha \sin(\pi/\alpha)}{\pi(\alpha - 1)^{1/\alpha}}.$$

944  
 945  
 946  
 947  
 948 □

949 In Figure 3, we compare the empirical results with theoretical predictions for the number of features that meet  
 950 the selection criteria in the optimal mask  $\mathcal{M}^*$  ( $\zeta_i^2 < 1 - \Omega$ ). The theoretical value, calculated as  $n \frac{\alpha \sin(\pi/\alpha)}{\pi(\sqrt{\alpha} - 1)^{1/\alpha}}$   
 951 ignoring the  $O(1)$  term, aligns well with the experimental data and the accuracy in estimation increases with  $\alpha$ .  
 952

953 **Proposition 6** (Scaling law for masked surrogate-to-target model). *Together with the eigenvalues, also assume  
 954 now power-law form for  $\lambda_i \beta_i^2$ , that is  $\lambda_i \beta_i^2 = i^{-\beta}$  for  $\beta > 1$ . Then, in the limit of  $p \rightarrow \infty$ , the excess test risk  
 955 for the masked surrogate-to-target model with the optimal dimensionality has the same scaling law as the  
 956 reference (target) model:*  
 957

$$\mathcal{R}(\beta^{s_{2t}}) = \Theta(n^{-(\beta-1)}) \quad \text{if } \beta < 2\alpha + 1,$$

958  
 959 and

$$\mathcal{R}(\beta^{s_{2t}}) = \Theta(n^{-2\alpha}) \quad \text{if } \beta > 2\alpha + 1.$$

960  
 961  
 962  
 963 *Proof.* As discussed in Section 4, in order to analyze the model's inherent error, we need to set  $\sigma_i^2 = O(n^{-\gamma})$   
 964 where  $\gamma$  is the exponent characterizing the scaling law of the test risk in the noiseless setting. We will work on  
 965 this proof in two cases depending on  $\beta$  and  $2\alpha + 1$ .  
 966

967 **Case 1:**  $\beta < 2\alpha + 1$ . In this case, it is previously stated by Cui et al. (2022); Simon et al. (2024) that the test  
 968 risk of ridgeless overparameterized linear regression can be described in the scaling sense as  $\mathbf{err} = \Theta(n^{-\beta+1})$   
 when  $\beta < 2\alpha + 1$ . Consider the optimal mask operation  $\mathcal{M}$  mentioned in Proposition 2 that selects all features

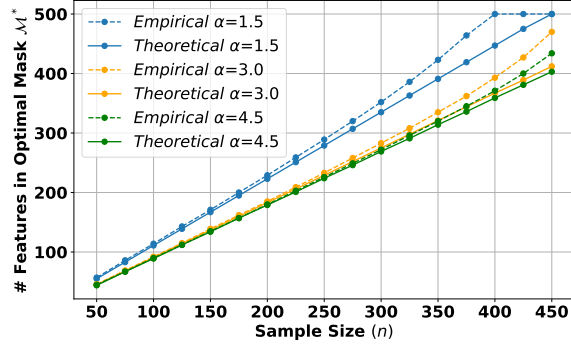

Figure 3: Comparison of the empirical and theoretical number of features satisfying the feature selection condition in the optimal mask  $\mathcal{M}^*$  ( $\zeta_i^2 < 1 - \Omega$ ). The theoretical value is calculated as  $n \frac{\alpha \sin(\pi/\alpha)}{\pi(\sqrt{\alpha} - 1)^{1/\alpha}}$ , ignoring the  $O(1)$  in Proposition 4. **Setting:** The feature size is  $p = 500$ , and the feature covariance follows the power-law structure  $\lambda_i = i^{-\alpha}$  for  $\alpha = 1.5, 3.0$ , and  $4.5$ .

satisfying  $1 - \zeta_i^2 > \Omega$ . Let  $p_s$  be the number of selected features. We can then decompose the risk estimate in Definition 2 as follows:

$$\frac{\mathcal{B}(\bar{\beta}_*) + \sigma_t^2 \Omega}{1 - \Omega} = \frac{\sum_{i=1}^{p_s} \lambda_i \zeta_i^2 \beta_i^2 + \sum_{i=p_s+1}^p \lambda_i \zeta_i^2 \beta_i^2 + \sigma_t^2 \Omega}{1 - \Omega} = \frac{\mathbf{err1} + \mathbf{err2} + \sigma_t^2 \Omega}{1 - \Omega},$$

where **err1** and **err2** are the contributions to the total risk of the target model from dimensions selected and omitted in the surrogate model, respectively. Therefore, we express the total error as:

$$\frac{\mathbf{err1} + \mathbf{err2} + \sigma_t^2 \Omega}{1 - \Omega} = \mathbf{err} = \Theta(n^{-\beta+1}).$$

Going back to Proposition 4, we know that, as  $p \rightarrow \infty$ , the criterion for selecting a feature  $i$  in the optimal masked surrogate model is given by

$$i > nC_2 + O(1), \quad \text{where} \quad C_2 = \frac{\alpha \sin(\pi/\alpha)}{\pi(\sqrt{\alpha} - 1)^{1/\alpha}}.$$

Define now  $\omega_n = nC_2 + O(1)$ . The equation (16) tells us that after the optimal mask operation  $\mathcal{M}$ , **err2** is replaced by **err2'**, which is calculated as follows

$$\mathbf{err2}' = \sum_{i=\omega_n+1}^p \lambda_i \beta_i^2 = \sum_{i=\omega_n+1}^p i^{-\beta}.$$

Since  $x^{-\beta}$  is a monotonically decreasing function, we can bound the summation by the following two integrals:

$$\int_{\omega_n+1}^{p+1} x^{-\beta} dx \leq \sum_{i=\omega_n+1}^p i^{-\beta} \leq \int_{\omega_n}^p x^{-\beta} dx$$

$$\frac{(\omega_n + 1)^{-\beta+1} - p^{-\beta+1}}{\beta - 1} \leq \sum_{i=\omega_n+1}^p i^{-\beta} \leq \frac{(\omega_n)^{-\beta+1} - p^{-\beta+1}}{\beta - 1}.$$

In the limit of  $p \rightarrow \infty$ , we obtain,

$$\mathbf{err2}' = \Theta(n^{-\beta+1}).$$

Thus, we have tightly estimated **err2'**. Using the fact from Proposition 3 that  $\Omega = \Theta(1)$ , and our assumption on noise variance  $\sigma_t^2 = O(n^{-\beta+1})$ , we conclude that the scaling law doesn't change for the surrogate-to-target model as

$$\mathcal{R}(\beta^{s2t}) = \frac{\mathbf{err1} + \sigma_t^2 \Omega}{1 - \Omega} + \mathbf{err2}' = \Theta(n^{-\beta+1}).$$



1020 **Case 2:**  $\beta > 2\alpha + 1$ . In this case, we show that the scaling law is determined by **err1**, hence changing  
 1021 **err2** to **err2'** has no effect in the scaling sense. From Proposition 3, we have the asymptotic expression  
 1022  $\tau_t = cn^{-\alpha} (1 + O(n^{-1}))$ , for  $c = \left(\frac{\pi}{\alpha \sin(\pi/\alpha)}\right)^\alpha$ . We can argue that there exists positive constants  $c_1 < \frac{1}{c} < c_2$ ,  
 1023 such that  $c_1 n^\alpha \leq \frac{1}{\tau_t} \leq c_2 n^\alpha$ . We have that  
 1024

$$\begin{aligned} \mathbf{err1} &= \sum_{i=1}^{\omega_n} \frac{i^{-\beta}}{\left(1 + \frac{1}{\tau_t} i^{-\alpha}\right)^2} \leq \sum_{i=1}^{\omega_n} \frac{i^{-\beta}}{(1 + c_1 n^\alpha i^{-\alpha})^2} \\ &= \sum_{i=1}^{\omega_n} \frac{i^{2\alpha-\beta}}{(i^\alpha + c_1 n^\alpha)^2} \leq \sum_{i=1}^{\omega_n} \frac{i^{2\alpha-\beta}}{c_1^2 n^{2\alpha}}. \end{aligned}$$

1025 This implies  $\mathbf{err1} = O(n^{-2\alpha})$ . At the same time,  
 1026

$$\begin{aligned} \mathbf{err1} &= \sum_{i=1}^{\omega_n} \frac{i^{-\beta}}{\left(1 + \frac{1}{\tau_t} i^{-\alpha}\right)^2} \geq \sum_{i=1}^{\omega_n} \frac{i^{2\alpha-\beta}}{(i^\alpha + c_2 n^\alpha)^2} \\ &\geq \sum_{i=1}^{\omega_n} \frac{i^{2\alpha-\beta}}{((\omega_n)^\alpha + c_2 n^\alpha)^2} = \sum_{i=1}^{\omega_n} \frac{i^{2\alpha-\beta}}{n^{2\alpha}((\omega_n/n)^\alpha + c_2)^2}. \end{aligned}$$

1027 Using  $\omega_n/n = \Theta(1)$  gives  $\mathbf{err1} = \Omega(n^{-2\alpha})$  and we can conclude that  $\mathbf{err1} = \Theta(n^{-2\alpha})$ . From Cui et al. (2022),  
 1028 we already know that  $\mathbf{err} = \Theta(n^{-2\alpha})$  when  $\beta > 2\alpha + 1$ . Using  $\Omega = \Theta(1)$ , and our assumption on the noise  
 1029 variance  $\sigma_t^2 = O(n^{-2\alpha})$  allows us to conclude that the scaling is dominated by **err1**, and thus, the scaling law  
 1030 remains unchanged.  $\square$

1031 **Proposition 5** (Scaling law). Assume that both eigenvalues  $\lambda_i$  and signal coefficients  $\lambda_i \beta_i^2$  follow a power-law  
 1032 decay, i.e.,  $\lambda_i \beta_i^2 = i^{-\beta}$  and  $\lambda_i = i^{-\alpha}$  for  $\alpha, \beta > 1$ . Let the optimal surrogate parameter  $\beta^{s*}$  be given by  
 1033 Proposition 1 and define the minimum surrogate-to-target risk attained by  $\beta^{s*}$  as  $\mathcal{R}^*(\beta^{s*}) = \min \mathcal{R}(\beta^{s*})$ .  
 1034 Then, in the limit of  $p \rightarrow \infty$ , the excess test risk of the surrogate-to-target model with an optimal surrogate  
 1035 parameter scales the same as that of the standard target model. Specifically, we have

$$\begin{aligned} \mathcal{R}^*(\beta^{s*}) &= \Theta(n^{-(\beta-1)}) = \mathcal{R}(\beta^t), & \text{if } \beta < 2\alpha + 1, \\ \mathcal{R}^*(\beta^{s*}) &= \Theta(n^{-2\alpha}) = \mathcal{R}(\beta^t), & \text{if } \beta > 2\alpha + 1. \end{aligned}$$

1036 *Proof.* From asymptotic risk decomposition in (26), we can write

$$\begin{aligned} \mathbb{E}_{\mathbf{g}_t} \left[ f(X_{\kappa_t, \sigma_t^2}^t(\mathbf{\Sigma}_t, \beta^s, \mathbf{g}_t)) \right] &= (\beta^s - \beta_\star)^\top \theta_1^\top \mathbf{\Sigma}_t \theta_1 (\beta^s - \beta_\star) + \gamma_t^2(\beta^s) \mathbb{E}_{\mathbf{g}_t} [\theta_2^\top \mathbf{\Sigma}_t \theta_2] \\ &\quad + \beta_\star^\top (\mathbf{I} - \theta_1)^\top \mathbf{\Sigma}_t (\mathbf{I} - \theta_1) \beta_\star - 2\beta_\star^\top (\mathbf{I} - \theta_1)^\top \mathbf{\Sigma}_t \theta_1 (\beta^s - \beta_\star) \\ &\geq \gamma_t^2(\beta^s) \mathbb{E}_{\mathbf{g}_t} [\theta_2^\top \mathbf{\Sigma}_t \theta_2], \end{aligned}$$

1037 since we can put in the form of  $(a - b)^2 + c^2 \geq c^2$ . At the same time, we know that

$$\begin{aligned} \gamma_t^2(\beta^s) \mathbb{E}_{\mathbf{g}_t} [\theta_2^\top \mathbf{\Sigma}_t \theta_2] &= \kappa_t \frac{\sigma_t^2 + \tau_t^2 \|(\mathbf{\Sigma}_t + \tau_t \mathbf{I})^{-1} \mathbf{\Sigma}_t^{1/2} \beta_\star\|_2^2}{1 - \frac{1}{n} \text{tr}((\mathbf{\Sigma}_t + \tau_t \mathbf{I})^{-2} \mathbf{\Sigma}_t^2)} \frac{\text{tr}(\mathbf{\Sigma}_t^2 (\mathbf{\Sigma}_t + \tau_t \mathbf{I})^{-2})}{p} \\ &= \kappa_t \frac{\sigma_t^2 + \tau_t^2 \|(\mathbf{\Sigma}_t + \tau_t \mathbf{I})^{-1} \mathbf{\Sigma}_t^{1/2} \beta_\star\|_2^2}{1 - \Omega} \frac{n\Omega}{p} \\ &= \frac{\Omega}{1 - \Omega} \left( \sigma_t^2 + \sum_{i=1}^p \lambda_i \beta_i^2 \zeta_i^2 \right). \end{aligned}$$

Recall the optimal surrogate vector discussed in Proposition 1 and the corresponding minimal surrogate-to-target risk  $\mathcal{R}^*(\boldsymbol{\beta}^{s2t})$ . In this case, we can write

$$\sum_{i=1}^p \lambda_i \beta_i^{s*2} \zeta_i^2 = \sum_{i=1}^p \lambda_i \beta_i^2 \frac{(1 - \zeta_i)^2 \zeta_i^2}{\left((1 - \zeta_i)^2 + \frac{\Omega}{1 - \Omega} \zeta_i^2\right)^2}.$$

Similar to the previous proposition and as discussed in Section 4, to analyze the model's inherent error, we set  $\sigma_t^2 = O(n^{-\gamma})$  where  $\gamma$  is the exponent characterizing the scaling law of the test risk in the noiseless setting. It is previously stated by Cui et al. (2022); Simon et al. (2024) that the test risk of ridgeless overparameterized linear regression can be described in the scaling sense as  $\mathbf{err} = \Theta(n^{-\beta+1})$  when  $\beta < 2\alpha + 1$ . We will proceed by considering two cases based on the relationship between  $\beta$  and  $2\alpha + 1$ .

**Case 1:**  $\beta < 2\alpha + 1$

Consider the interval of  $i$ 's satisfying  $\zeta_i > 1 - \Omega$  and  $\zeta_i^2 < 1 - \Omega$ . By Proposition 4, we have

$$\zeta_i > 1 - \Omega \iff i > nC_1 + O(1), \quad \text{where } C_1 = \frac{\alpha \sin(\pi/\alpha)}{\pi(\alpha - 1)^{1/\alpha}}.$$

$$\zeta_i^2 > 1 - \Omega \iff i > nC_2 + O(1), \quad \text{where } C_2 = \frac{\alpha \sin(\pi/\alpha)}{\pi(\sqrt{\alpha} - 1)^{1/\alpha}}.$$

Let  $\omega_n$  be defined as in the previous proposition and define  $\phi_n = nC_1 + O(1)$ . Then, the interval of interest corresponds to the set of indices  $i$  such that  $\phi_n < i < \omega_n$ . Within this interval, we observe

$$(1 - \zeta_i)^2 \zeta_i^2 \geq \min\left((1 - \Omega)^2 \Omega^2, \left(1 - \sqrt{1 - \Omega}\right)^2 (1 - \Omega)\right) = k_1$$

$$(1 - \zeta_i)^2 + \frac{\Omega}{1 - \Omega} \zeta_i^2 \leq 1 + \frac{\Omega}{1 - \Omega} = k_2$$

Using the fact from Proposition 3 that  $\Omega = \frac{\alpha - 1}{\alpha} - O(n^{-1})$  tells us  $k_1 = \Theta(1)$  and  $k_2 = \Theta(1)$ . Utilizing these bounds, we obtain

$$\begin{aligned} \mathcal{R}^*(\boldsymbol{\beta}^{s2t}) &\geq \sum_{i=1}^p \lambda_i \beta_i^2 \frac{(1 - \zeta_i)^2 \zeta_i^2}{\left((1 - \zeta_i)^2 + \frac{\Omega}{1 - \Omega} \zeta_i^2\right)^2} \geq \sum_{i=\phi_n}^{\omega_n} i^{-\beta} \frac{(1 - \zeta_i)^2 \zeta_i^2}{\left((1 - \zeta_i)^2 + \frac{\Omega}{1 - \Omega} \zeta_i^2\right)^2} \geq \sum_{i=\phi_n}^{\omega_n} i^{-\beta} \frac{k_1}{k_2} \\ &= n^{-\beta+1} \frac{k_1}{k_2} \left((\omega_n/n)^{-\beta+1} - (\phi_n/n)^{-\beta+1}\right) \\ &= \Theta(n^{-\beta+1}). \end{aligned}$$

Recalling  $\omega_n/n = \Theta(1)$  and  $\phi_n/n = \Theta(1)$ , we obtain that  $\mathcal{R}^*(\boldsymbol{\beta}^{s2t}) = \Omega(n^{-\beta+1})$ , and thus,

$$\mathcal{R}(\boldsymbol{\beta}^{s2t}) \geq \mathcal{R}^*(\boldsymbol{\beta}^{s2t}) \implies \mathcal{R}(\boldsymbol{\beta}^{s2t}) = \Omega(n^{-\beta+1}).$$

**Case 2:**  $\beta > 2\alpha + 1$

In this case, we have

$$\begin{aligned} \mathcal{R}^*(\boldsymbol{\beta}^{s2t}) &\geq \sum_{i=1}^p \lambda_i \beta_i^2 \frac{(1 - \zeta_i)^2 \zeta_i^2}{\left((1 - \zeta_i)^2 + \frac{\Omega}{1 - \Omega} \zeta_i^2\right)^2} = \sum_{i=1}^p \lambda_i \beta_i^2 \zeta_i^2 \frac{(1 - \zeta_i)^2}{\left((1 - \zeta_i)^2 + \frac{\Omega}{1 - \Omega} \zeta_i^2\right)^2} \\ &\geq \sum_{i: \zeta_i < 1 - \Omega} \lambda_i \zeta_i^2 \beta_i^2 \frac{\Omega^2}{\left(1 + \frac{\Omega}{1 - \Omega}\right)^2} = \sum_{i=1}^{\phi_n} \frac{i^{-\beta}}{\left(1 + \frac{1}{i^{-\alpha}}\right)^2} k_3, \end{aligned}$$

where  $k_3 = \frac{\Omega^2}{\left(1 + \frac{\Omega}{1 - \Omega}\right)^2} = \Theta(1)$ . From Case 2 in Proposition 6, we already know that the same summation – with upper bound  $\omega_n$  rather than  $\phi_n$  – scales as  $\Theta(n^{-2\alpha})$ . Yet, since  $\phi_n$  and  $\omega_n$  have the same order  $\Theta(n)$ , the result remains. This suggests  $\mathcal{R}^*(\boldsymbol{\beta}^{s2t}) = \Omega(n^{-2\alpha})$ , which eventually yields

$$\mathcal{R}(\boldsymbol{\beta}^{s2t}) \geq \mathcal{R}^*(\boldsymbol{\beta}^{s2t}) \implies \mathcal{R}(\boldsymbol{\beta}^{s2t}) = \Omega(n^{-2\alpha}).$$

Hence, this allows us to say that the scaling law doesn't improve even with the freedom to choose any  $\boldsymbol{\beta}^s$ .  $\square$

1122 **Proposition 7** (Non-asymptotic analysis of  $\tau$ ). Suppose that  $\Sigma \in \mathbb{R}^{p \times p}$  is diagonal and  $\Sigma_{i,i} = \lambda_i = i^{-\alpha}$  for

1123  $1 < \alpha$ . Assume that  $n < pk$  for  $k = \frac{3 + \frac{1}{2^\alpha}}{4 + \frac{1}{2^{\alpha-2}}}$ . If  $\xi$  satisfies

$$\sum_{i=1}^p \frac{\lambda_i}{\lambda_i + \frac{1}{\xi}} = n,$$

1128 then  $cn^\alpha \leq \xi \leq c(n + 1 + \frac{p+1}{\alpha-1})^\alpha$  for  $c = \left(\frac{\alpha \sin(\pi/\alpha)}{\pi}\right)^\alpha$ . Note that  $\xi$  is defined for the sake of the analysis, and

1129 it corresponds to  $\frac{1}{\tau}$ .

1130 *Proof.* From [Simon et al. \(2024\)](#), we have:

$$n = \sum_{i=1}^p \frac{i^{-\alpha}}{i^{-\alpha} + \frac{1}{\xi}} \leq \int_0^p \frac{x^{-\alpha}}{x^{-\alpha} + \frac{1}{\xi}} dx = \int_0^\infty \frac{x^{-\alpha}}{x^{-\alpha} + \frac{1}{\xi}} dx - \int_p^\infty \frac{x^{-\alpha}}{x^{-\alpha} + \frac{1}{\xi}} dx = \frac{\pi}{\alpha \sin(\pi/\alpha)} \xi^{1/\alpha} - \int_p^\infty \frac{x^{-\alpha}}{x^{-\alpha} + \frac{1}{\xi}} dx.$$

1133 Using  $1 + x^\alpha \leq (1+x)^\alpha$  for  $x \geq 0$ ,

$$\int_p^\infty \frac{x^{-\alpha}}{x^{-\alpha} + \frac{1}{\xi}} dx = \int_p^\infty \frac{1}{1 + \frac{x^\alpha}{\xi}} dx \geq \int_p^\infty \frac{1}{(1 + \frac{x}{\xi^{1/\alpha}})^\alpha} dx = \frac{\xi(\xi^{1/\alpha} + p)^{-\alpha+1}}{\alpha - 1},$$

1134 which implies that

$$n \leq \frac{\pi}{\alpha \sin(\pi/\alpha)} \xi^{1/\alpha} - \frac{\xi(\xi^{1/\alpha} + p)^{-\alpha+1}}{\alpha - 1}.$$

1135 Since the summand is decreasing, we can bound the Riemann sum by an integral, thus:

$$\begin{aligned} n &= \sum_{i=1}^p \frac{i^{-\alpha}}{i^{-\alpha} + \frac{1}{\xi}} \geq \int_1^{p+1} \frac{x^{-\alpha}}{x^{-\alpha} + \frac{1}{\xi}} dx \\ &= \int_0^\infty \frac{x^{-\alpha}}{x^{-\alpha} + \frac{1}{\xi}} dx - \int_0^1 \frac{x^{-\alpha}}{x^{-\alpha} + \frac{1}{\xi}} dx - \int_{p+1}^\infty \frac{x^{-\alpha}}{x^{-\alpha} + \frac{1}{\xi}} dx \\ &= \frac{\pi}{\alpha \sin(\pi/\alpha)} \xi^{1/\alpha} - \int_0^1 \frac{x^{-\alpha}}{x^{-\alpha} + \frac{1}{\xi}} dx - \int_{p+1}^\infty \frac{x^{-\alpha}}{x^{-\alpha} + \frac{1}{\xi}} dx \\ &\geq \frac{\pi}{\alpha \sin(\pi/\alpha)} \xi^{1/\alpha} - 1 - \int_{p+1}^\infty \frac{1}{1 + \frac{1}{\xi} x^\alpha} dx \\ &\geq \frac{\pi}{\alpha \sin(\pi/\alpha)} \xi^{1/\alpha} - 1 - \int_{p+1}^\infty \frac{1}{\frac{1}{\xi} x^\alpha} dx \\ &= \frac{\pi}{\alpha \sin(\pi/\alpha)} \xi^{1/\alpha} - 1 - \left[ \frac{\xi x^{-\alpha+1}}{-\alpha + 1} \right]_{p+1}^\infty \\ &= \frac{\pi}{\alpha \sin(\pi/\alpha)} \xi^{1/\alpha} - \frac{\xi(p+1)^{-\alpha+1}}{\alpha - 1} - 1. \end{aligned}$$

1136 Recalling that  $\alpha > 1$  and assuming  $\xi < p^\alpha$ , we derive:

$$\begin{aligned} \frac{\pi}{\alpha \sin(\pi/\alpha)} \xi^{1/\alpha} - 1 - \frac{p+1}{\alpha - 1} &\leq n \leq \frac{\pi}{\alpha \sin(\pi/\alpha)} \xi^{1/\alpha} \\ \Leftrightarrow \left(\frac{n\alpha \sin(\pi/\alpha)}{\pi}\right)^\alpha &\leq \xi \leq \left(\frac{(n+1 + \frac{p+1}{\alpha-1})\alpha \sin(\pi/\alpha)}{\pi}\right)^\alpha. \end{aligned}$$

We conclude by proving that  $\xi < p^\alpha$ . For the sake of contradiction, assume that  $\xi \geq p^\alpha$ . Then,

$$\begin{aligned} n &= \sum_{i=1}^p \frac{1}{1 + \frac{i^\alpha}{\xi}} = \sum_{i=1}^{p/2} \frac{1}{1 + \frac{i^\alpha}{\xi}} + \sum_{i=p/2+1}^p \frac{1}{1 + \frac{i^\alpha}{\xi}} \\ &\geq \sum_{i=1}^{p/2} \frac{1}{1 + \frac{1}{2^\alpha}} + \sum_{i=p/2+1}^p \frac{1}{1+1} \\ &= p \left( \frac{3 + \frac{1}{2^\alpha}}{4 + \frac{1}{2^{\alpha-2}}} \right), \end{aligned}$$

which contradicts our assumption that  $n < pk$ .  $\square$

**Proposition 8** (Non-asymptotic analysis of  $\Omega$ ). *Suppose that  $\Sigma \in \mathbb{R}^{p \times p}$  is diagonal and  $\Sigma_{i,i} = \lambda_i = i^{-\alpha}$  for  $1 < \alpha$ . Let  $\tau_i$  be defined as in Proposition 7 and  $\Omega$  be the solution to*

$$n\Omega = \sum_{i=1}^p \left( \frac{\lambda_i}{\lambda_i + \frac{1}{\xi}} \right)^2.$$

Then,

$$\Omega > \frac{\alpha - 1}{\alpha} - \frac{1}{2\alpha - 1} \left( \frac{n + 1 + \frac{p+1}{\alpha-1}}{p + 1} \right)^{2\alpha-1} - \frac{1}{n}.$$

*Proof.* We have that

$$\sum_{i=1}^p \left( \frac{i^{-\alpha}}{i^{-\alpha} + \frac{1}{\xi}} \right)^2 \leq \int_0^\infty \left( \frac{x^{-\alpha}}{x^{-\alpha} + \frac{1}{\xi}} \right)^2 dx = \frac{\pi(\alpha - 1)}{\alpha^2 \sin(\pi/\alpha)} \xi^{1/\alpha}$$

Besides, since the summand is monotonically decreasing:

$$\begin{aligned} n\Omega &= \sum_{i=1}^p \left( \frac{i^{-\alpha}}{i^{-\alpha} + \frac{1}{\xi}} \right)^2 \geq \int_1^{p+1} \left( \frac{x^{-\alpha}}{x^{-\alpha} + \frac{1}{\xi}} \right)^2 dx \\ &= \int_0^\infty \left( \frac{x^{-\alpha}}{x^{-\alpha} + \frac{1}{\xi}} \right)^2 dx - \int_0^1 \left( \frac{x^{-\alpha}}{x^{-\alpha} + \frac{1}{\xi}} \right)^2 dx - \int_{p+1}^\infty \left( \frac{x^{-\alpha}}{x^{-\alpha} + \frac{1}{\xi}} \right)^2 dx \\ &= \frac{\pi(\alpha - 1)}{\alpha^2 \sin(\pi/\alpha)} \xi^{1/\alpha} - \int_0^1 \left( \frac{x^{-\alpha}}{x^{-\alpha} + \frac{1}{\xi}} \right)^2 dx - \int_{p+1}^\infty \left( \frac{x^{-\alpha}}{x^{-\alpha} + \frac{1}{\xi}} \right)^2 dx \\ &\geq \frac{\pi(\alpha - 1)}{\alpha^2 \sin(\pi/\alpha)} \xi^{1/\alpha} - 1 - \int_{p+1}^\infty \left( \frac{1}{1 + \frac{1}{\xi} x^\alpha} \right)^2 dx \\ &\geq \frac{\pi(\alpha - 1)}{\alpha^2 \sin(\pi/\alpha)} \xi^{1/\alpha} - 1 - \int_{p+1}^\infty \frac{1}{(\frac{1}{\xi} x^\alpha)^2} dx \\ &= \frac{\pi(\alpha - 1)}{\alpha^2 \sin(\pi/\alpha)} \xi^{1/\alpha} - 1 - \left[ \frac{\xi^2 x^{-2\alpha+1}}{-2\alpha + 1} \right]_{p+1}^\infty \\ &= \frac{\pi(\alpha - 1)}{\alpha^2 \sin(\pi/\alpha)} \xi^{1/\alpha} - \frac{\xi^2 (p+1)^{-2\alpha+1}}{2\alpha - 1} - 1. \end{aligned}$$

Let's now utilize the upper and lower bounds for  $\xi$  from Proposition 7. Then, we have

$$\begin{aligned}
n\Omega &\geq \frac{\pi(\alpha-1)}{\alpha^2 \sin(\pi/\alpha)} \frac{n\alpha \sin(\pi/\alpha)}{\pi} - \frac{\xi^2(p+1)^{-2\alpha+1}}{2\alpha-1} - 1 \\
&= \frac{n(\alpha-1)}{\alpha} - \frac{\xi^2(p+1)^{-2\alpha+1}}{2\alpha-1} - 1 \\
&\geq \frac{n(\alpha-1)}{\alpha} - \left( \frac{(n+1 + \frac{p+1}{\alpha-1}) \alpha \sin(\pi/\alpha)}{\pi(p+1)} \right)^{2\alpha} \frac{p+1}{2\alpha-1} - 1 \\
\Rightarrow \Omega &> \frac{\alpha-1}{\alpha} - \left( \frac{(n+1 + \frac{p+1}{\alpha-1}) \alpha \sin(\pi/\alpha)}{\pi(p+1)} \right)^{2\alpha} \frac{p+1}{n(2\alpha-1)} - \frac{1}{n} \\
&> \frac{\alpha-1}{\alpha} - \frac{1}{2\alpha-1} \left( \frac{n+1 + \frac{p+1}{\alpha-1}}{p+1} \right)^{2\alpha-1} - \frac{1}{n},
\end{aligned}$$

since  $\frac{\alpha \sin(\pi/\alpha)}{\pi} < 1$  for  $\alpha > 1$ . □

**Proposition 9.** Under the assumption that  $n < \min \left( (p+1) \frac{\alpha-2}{\alpha}, p \left( \frac{3 + \frac{1}{2^\alpha}}{4 + \frac{1}{2^{\alpha-2}}} \right), p \frac{\pi \left( \sqrt{\frac{\alpha}{2}} - 1 \right)^{1/\alpha}}{\alpha \sin(\pi/\alpha)} - \frac{p+1}{\alpha-1} \right) - 1$  and  $\alpha > 3$ , we can find a masked surrogate-to-target setting that improves over the risk of the standard target model by selecting all features  $i$  such that  $\xi_i^2 > 1 - \Omega$ .

*Proof.* From Proposition 8, we have

$$\Omega > \frac{\alpha-1}{\alpha} - \frac{1}{2\alpha-1} \left( \frac{n+1 + \frac{p+1}{\alpha-1}}{p+1} \right)^{2\alpha-1} - \frac{1}{n}.$$

It's then enough to show that we can find a set of  $i$ 's such that

$$\xi_i^2 > \frac{1}{\alpha} + \frac{1}{2\alpha-1} \left( \frac{n+1 + \frac{p+1}{\alpha-1}}{p+1} \right)^{2\alpha-1} + \frac{1}{n}.$$

From proof of Proposition 3, we know that

$$\xi_i^2 > c' \iff i > \tau_i^{-1/\alpha} \left( \frac{\sqrt{c'}}{1 - \sqrt{c'}} \right)^{1/\alpha}.$$

Hence, using the bound on  $\frac{1}{\tau_i} = \xi$  from Proposition 7, it's enough to find indices  $i$  such that

$$i > \frac{\alpha \sin(\pi/\alpha)}{\pi} \left( n+1 + \frac{p+1}{\alpha-1} \right) \left( \frac{\sqrt{c'}}{1 - \sqrt{c'}} \right)^{1/\alpha} \quad \text{where } c' = \frac{1}{\alpha} + \frac{1}{2\alpha-1} \left( \frac{n+1 + \frac{p+1}{\alpha-1}}{p+1} \right)^{2\alpha-1} + \frac{1}{n}. \quad (21)$$

By our assumption  $p+1 > n+1 + \frac{p+1}{\alpha-1}$ , we obtain that  $\frac{2}{\alpha} > c'$ . Since  $\left( \frac{\sqrt{x}}{1 - \sqrt{x}} \right)^{1/\alpha}$  is increasing with  $x$  when  $0 \leq x \leq 1$ , we have

$$\left( \frac{1}{\sqrt{\frac{\alpha}{2}} - 1} \right)^{1/\alpha} \geq \left( \frac{\sqrt{c'}}{1 - \sqrt{c'}} \right)^{1/\alpha}.$$

Then, to ensure the existence of an interval of  $i$ 's satisfying the above inequality, we choose

$$\begin{aligned}
p - (p+1) \frac{\alpha \sin(\pi/\alpha)}{\pi(\alpha-1)} \left( \frac{1}{\sqrt{\frac{\alpha}{2}} - 1} \right)^{1/\alpha} &\geq (n+1) \frac{\alpha \sin(\pi/\alpha)}{\pi} \left( \frac{1}{\sqrt{\frac{\alpha}{2}} - 1} \right)^{1/\alpha} \\
\iff p \frac{\pi \left( \sqrt{\frac{\alpha}{2}} - 1 \right)^{1/\alpha}}{\alpha \sin(\pi/\alpha)} - \frac{p+1}{\alpha-1} &\geq n+1
\end{aligned}$$

One can verify that the LHS expression is always positive when  $\alpha > 3$ . Thus, discarding the features  $i$  provided in the interval (21) will strictly improve the test risk of the masked surrogate-to-target model over the standard target model.  $\square$

## C PROOFS FOR SECTION 5

**Theorem 3** (Distributional characterization, Han & Xu (2023)). *Let  $\kappa_s = p/m > 1$  and suppose that, for some  $M > 1$ ,  $1/M \leq \kappa_s, \sigma_s^2 \leq M$  and  $\|\Sigma_s\|_{op}, \|\Sigma_s^{-1}\|_{op} \leq M$ . Let  $\tau_s \in \mathbb{R}$  be the unique solution of the following equation:*

$$\kappa_s^{-1} = \frac{1}{p} \text{tr}((\Sigma_s + \tau_s \mathbf{I})^{-1} \Sigma_s). \quad (22)$$

We define the function  $\gamma_s : \mathbb{R}^p \rightarrow \mathbb{R}$  and the random variable based on  $\mathbf{g}_s \sim \mathcal{N}(0, \mathbf{I})$  as follows:

$$\gamma_s^2(\boldsymbol{\beta}_\star) := \kappa_s \left( \sigma_s^2 + \mathbb{E}_{(x,y) \sim \mathcal{D}_s} [\|\Sigma_s^{1/2}(\boldsymbol{\beta}^s - \boldsymbol{\beta}_\star)\|_2^2] \right) = \kappa_s \frac{\sigma_s^2 + \tau_s^2 \|(\Sigma_s + \tau_s \mathbf{I})^{-1} \Sigma_s^{1/2} \boldsymbol{\beta}_\star\|_2^2}{1 - \frac{1}{m} \text{tr}((\Sigma_s + \tau_s \mathbf{I})^{-2} \Sigma_s^2)} \quad (23)$$

$$X_{\kappa_s, \sigma_s^2}^s(\Sigma_s, \boldsymbol{\beta}_\star, \mathbf{g}_s) := (\Sigma_s + \tau_s \mathbf{I})^{-1} \Sigma_s \left[ \boldsymbol{\beta}_\star + \frac{\Sigma_s^{-1/2} \gamma_s(\boldsymbol{\beta}_\star) \mathbf{g}_s}{\sqrt{p}} \right].$$

Then, for any  $L$ -Lipschitz function  $f : \mathbb{R}^p \rightarrow \mathbb{R}$  where  $L < L(M)$ , there exists a constant  $C = C(M)$  such that for any  $\varepsilon \in (0, 1/2]$ , we have the following:

$$\mathbb{P} \left( \sup_{\boldsymbol{\beta}_\star \in \mathcal{B}(R)} \left| f(\boldsymbol{\beta}^s) - \mathbb{E}_{\mathbf{g}_s} [f(X_{\kappa_s, \sigma_s^2}^s(\Sigma_s, \boldsymbol{\beta}_\star, \mathbf{g}_s))] \right| \geq \varepsilon \right) \leq C p e^{-p\varepsilon^4/C}, \quad (24)$$

where  $R < M$ .

**Definition 3.** Recall the definition of  $\tau_t$  and  $\gamma_t$  in Theorem 1. Let  $\kappa_s = p/m > 1$  and define  $\tau_s \in \mathbb{R}$  similar to  $\tau_t$ . We define the function  $\gamma_s : \mathbb{R}^p \rightarrow \mathbb{R}$  and the random variable  $X_{\kappa_s, \sigma_s^2}^s$  based on  $\mathbf{g}_s \sim \mathcal{N}(0, \mathbf{I})$  as follows:

$$\gamma_s^2(\boldsymbol{\beta}_\star) = \kappa_s \left( \sigma_s^2 + \mathbb{E}_{(\bar{x}, \bar{y}) \sim \mathcal{D}_s} [\|\Sigma_s^{1/2}(\boldsymbol{\beta}^s - \boldsymbol{\beta}_\star)\|_2^2] \right), \quad X_{\kappa_s, \sigma_s^2}^s(\Sigma_s, \boldsymbol{\beta}_\star, \mathbf{g}_s) := (\Sigma_s + \tau_s \mathbf{I})^{-1} \Sigma_s \left[ \boldsymbol{\beta}_\star + \frac{\Sigma_s^{-1/2} \gamma_s(\boldsymbol{\beta}_\star) \mathbf{g}_s}{\sqrt{p}} \right].$$

Let  $\hat{\kappa} = (\kappa_s, \kappa_t)$ ,  $\hat{\Sigma} = (\Sigma_s, \Sigma_t)$ , and  $\hat{\sigma} = (\sigma_s^2, \sigma_t^2)$ . Then, we define the asymptotic risk estimate as

$$\begin{aligned} \bar{\mathcal{R}}_{\hat{\kappa}, \hat{\sigma}}(\hat{\Sigma}, \boldsymbol{\beta}_\star) &= \|\Sigma_t^{1/2} (\mathbf{I} - (\Sigma_t + \tau_t \mathbf{I})^{-1} \Sigma_t (\Sigma_s + \tau_s \mathbf{I})^{-1} \Sigma_s) \boldsymbol{\beta}_\star\|_2^2 + \frac{\mathbb{E}_{\boldsymbol{\beta}^s \sim X_{\kappa_s, \sigma_s^2}^s} [\gamma_t^2(\boldsymbol{\beta}^s)]}{p} \text{tr}(\Sigma_t^2 (\Sigma_t + \tau_t \mathbf{I})^{-2}) \\ &\quad + \frac{\gamma_s^2(\boldsymbol{\beta}_\star)}{p} \text{tr}(\Sigma_s^{1/2} (\Sigma_s + \tau_s \mathbf{I})^{-1} \Sigma_t (\Sigma_t + \tau_t \mathbf{I})^{-1} \Sigma_t (\Sigma_t + \tau_t \mathbf{I})^{-1} \Sigma_t (\Sigma_s + \tau_s \mathbf{I})^{-1} \Sigma_s^{1/2}). \end{aligned}$$

**Theorem 2.** Suppose that, for some constant  $M_t > 1$ , we have  $1/M_t \leq \kappa_s, \sigma_s^2, \kappa_t, \sigma_t^2 \leq M_t$  and  $\|\Sigma_s\|_{op}, \|\Sigma_s^{-1}\|_{op}, \|\Sigma_t\|_{op}, \|\Sigma_t^{-1}\|_{op} \leq M_t$ . Consider the surrogate-to-target model defined in Section 2, and let  $\mathcal{R}(\boldsymbol{\beta}^{s2t})$  represent its risk when  $\boldsymbol{\beta}_\star$  is given. Recall the definition of  $\hat{\Sigma}, \hat{\kappa}, \hat{\sigma}$  and  $\bar{\mathcal{R}}_{\hat{\kappa}, \hat{\sigma}}$  in Definition 3. Then, there exists a constant  $C = C(M_t)$  such that for any  $\varepsilon \in (0, 1/2]$ , the following holds when  $R + 1 < M$ :

$$\sup_{\boldsymbol{\beta}_\star \in \mathcal{B}_p(R)} \mathbb{P}(|\mathcal{R}(\boldsymbol{\beta}^{s2t}) - \bar{\mathcal{R}}_{\hat{\kappa}, \hat{\sigma}}(\hat{\Sigma}, \boldsymbol{\beta}_\star)| \geq \varepsilon) \leq C p e^{-p\varepsilon^4/C}.$$

*Proof.* Define a function  $f_1 : \mathbb{R}^p \rightarrow \mathbb{R}$  as  $f_1(\mathbf{x}) = \|\Sigma_t^{1/2}(\mathbf{x} - \boldsymbol{\beta}_\star)\|_2^2$ . The gradient of this function is

$$\|\nabla f_1(\mathbf{x})\|_2 = \|2\Sigma_t(\mathbf{x} - \boldsymbol{\beta}_\star)\|_2 \leq 2\|\Sigma_t\|_{op} \|\mathbf{x} - \boldsymbol{\beta}_\star\|_2.$$

Using Proposition 11, there exists an event  $E$  with  $\mathbb{P}(E^c) \leq C_t e^{-p/C_t}$  where  $C_t = C_t(M_t, \frac{M_t - R}{2})$  with the definition of  $M_t$  in Proposition 11, such that  $f_1(\boldsymbol{\beta}^{s2t})$  is  $2M_t^2$ -Lipschitz if  $\boldsymbol{\beta}_\star \in \mathcal{B}_p(R)$ . Applying Theorem 3 on the target model, there exists a constant  $\bar{C}_s = \bar{C}_s(M_t)$  such that for any  $\varepsilon \in (0, 1/2]$ , we obtain

$$\sup_{\boldsymbol{\beta}^s \in \mathcal{B}(\frac{M_t + R}{2})} \mathbb{P} \left( \left| f(\boldsymbol{\beta}^{s2t}) - \mathbb{E}_{\mathbf{g}_t} [f(X_{\kappa_t, \sigma_t^2}^t(\Sigma_t, \boldsymbol{\beta}^s, \mathbf{g}_t))] \right| \geq \varepsilon \right) \leq C p e^{-p\varepsilon^4/C}, \quad (25)$$

where  $f(\boldsymbol{\beta}^{s2t}) = \mathcal{R}(\boldsymbol{\beta}^{s2t})$  and

$$X_{\kappa_t, \sigma_t^2}^t(\boldsymbol{\Sigma}_t, \boldsymbol{\beta}^s, \mathbf{g}_t) = (\boldsymbol{\Sigma}_t + \tau_t \mathbf{I})^{-1} \boldsymbol{\Sigma}_t \left[ \boldsymbol{\beta}^s + \frac{\boldsymbol{\Sigma}_t^{-1/2} \gamma_t(\boldsymbol{\beta}^s) \mathbf{g}_t}{\sqrt{p}} \right].$$

Furthermore,

$$\begin{aligned} \mathbb{E}_{\mathbf{g}_t} \left[ f(X_{\kappa_t, \sigma_t^2}^s(\boldsymbol{\Sigma}_t, \boldsymbol{\beta}^s, \mathbf{g}_t)) \right] &= \mathbb{E}_{\mathbf{g}_t} \left[ \|\boldsymbol{\Sigma}_t^{1/2} (\boldsymbol{\theta}_1(\boldsymbol{\beta}^s - \boldsymbol{\beta}_\star) - (\mathbf{I} - \boldsymbol{\theta}_1)\boldsymbol{\beta}_\star + \boldsymbol{\theta}_2 \gamma_t(\boldsymbol{\beta}^s))\|_2^2 \right] \\ &= (\boldsymbol{\beta}^s - \boldsymbol{\beta}_\star)^\top \boldsymbol{\theta}_1^\top \boldsymbol{\Sigma}_t \boldsymbol{\theta}_1 (\boldsymbol{\beta}^s - \boldsymbol{\beta}_\star) + \gamma_t^2(\boldsymbol{\beta}^s) \mathbb{E}_{\mathbf{g}_t} [\boldsymbol{\theta}_2^\top \boldsymbol{\Sigma}_t \boldsymbol{\theta}_2] \\ &\quad + \boldsymbol{\beta}_\star^\top (\mathbf{I} - \boldsymbol{\theta}_1)^\top \boldsymbol{\Sigma}_t (\mathbf{I} - \boldsymbol{\theta}_1) \boldsymbol{\beta}_\star - 2 \boldsymbol{\beta}_\star^\top (\mathbf{I} - \boldsymbol{\theta}_1)^\top \boldsymbol{\Sigma}_t \boldsymbol{\theta}_1 (\boldsymbol{\beta}^s - \boldsymbol{\beta}_\star), \end{aligned} \quad (26)$$

where  $\boldsymbol{\theta}_1 := (\boldsymbol{\Sigma}_t + \tau_t \mathbf{I})^{-1} \boldsymbol{\Sigma}_t$  and  $\boldsymbol{\theta}_2 := (\boldsymbol{\Sigma}_t + \tau_t \mathbf{I})^{-1} \boldsymbol{\Sigma}_t^{1/2} \frac{\mathbf{g}_t}{\sqrt{p}}$ . Let  $E(M_t, \frac{M_t - R}{2})$  be the event defined in Proposition 10. Let  $f_2 : \mathbb{R}^p \rightarrow \mathbb{R}$  be defined as  $f_2(\mathbf{x}) := (\mathbf{x} - \boldsymbol{\beta}_\star)^\top \boldsymbol{\theta}_1^\top \boldsymbol{\Sigma}_t \boldsymbol{\theta}_1 (\mathbf{x} - \boldsymbol{\beta}_\star)$ . By Proposition 12, the function  $f_2$  is  $2M_t^2$ -Lipschitz if  $\boldsymbol{\beta}_\star \in \mathcal{B}_p(R)$  on the event  $E(M_t, \frac{M_t - R}{2})$ . Applying Theorem 3 on the surrogate model, there exists a constant  $\bar{C}_{w,1} = \bar{C}_{w,1}(M_t)$  such that for any  $\varepsilon \in (0, 1/2]$ , we obtain

$$\sup_{\boldsymbol{\beta}_\star \in \mathcal{B}_p(R)} \mathbb{P} \left( \left| f_2(\boldsymbol{\beta}^s) - \boldsymbol{\beta}_\star^\top (\mathbf{I} - \boldsymbol{\Phi}_1)^\top \boldsymbol{\theta}_1^\top \boldsymbol{\Sigma}_t \boldsymbol{\theta}_1 (\mathbf{I} - \boldsymbol{\Phi}_1) \boldsymbol{\beta}_\star - \gamma_s^2(\boldsymbol{\beta}_\star) \mathbb{E}_{\mathbf{g}_s} [\boldsymbol{\Phi}_2^\top \boldsymbol{\theta}_1^\top \boldsymbol{\Sigma}_t \boldsymbol{\theta}_1 \boldsymbol{\Phi}_2] \right| > \varepsilon \right) \leq \bar{C}_{w,1} p e^{-p\varepsilon^4 / \bar{C}_{w,1}}, \quad (27)$$

where  $\boldsymbol{\Phi}_1 := (\boldsymbol{\Sigma}_s + \tau_s \mathbf{I})^{-1} \boldsymbol{\Sigma}_s$  and  $\boldsymbol{\Phi}_2 := (\boldsymbol{\Sigma}_s + \tau_s \mathbf{I})^{-1} \boldsymbol{\Sigma}_s^{1/2} \frac{\mathbf{g}_s}{\sqrt{p}}$ .

Let  $f_3 : \mathbb{R}^p \rightarrow \mathbb{R}$  be defined as  $f_3(\mathbf{x}) := \gamma_t^2(\mathbf{x}) \boldsymbol{\theta}_2^\top \boldsymbol{\Sigma}_t \boldsymbol{\theta}_2$ . By Proposition 13 and Proposition 2.1 in Han & Xu (2023), the function  $f_3$  is  $4M_t^2$ -Lipschitz if  $\boldsymbol{\beta}_\star \in \mathcal{B}_p(R)$  on the event  $E(M_t, \frac{M_t - R}{2})$ . Applying Theorem 3 on the surrogate model, there exists a constant  $\bar{C}_{w,2} = \bar{C}_{w,2}(M_t)$  such that for any  $\varepsilon \in (0, 1/2]$ , we obtain

$$\sup_{\boldsymbol{\beta}_\star \in \mathcal{B}_p(R)} \mathbb{P} \left( \left| f_3(\boldsymbol{\beta}^s) - \mathbb{E}_{\boldsymbol{\beta}^s \sim X^s} [\gamma_t^2(\boldsymbol{\beta}^s)] \mathbb{E}_{\mathbf{g}_t} [\boldsymbol{\theta}_2^\top \boldsymbol{\Sigma}_t \boldsymbol{\theta}_2] \right| > \varepsilon \right) \leq \bar{C}_{w,2} p e^{-p\varepsilon^4 / \bar{C}_{w,2}}. \quad (28)$$

Let  $f_4 : \mathbb{R}^p \rightarrow \mathbb{R}$  as  $f_4(\mathbf{x}) := -2\boldsymbol{\beta}_\star^\top (\mathbf{I} - \boldsymbol{\theta}_1)^\top \boldsymbol{\Sigma}_t \boldsymbol{\theta}_1 (\mathbf{x} - \boldsymbol{\beta}_\star)$ . By Proposition 14 and Proposition 2.1 in Han & Xu (2023), the function  $f_4$  is  $2M_t^2$ -Lipschitz if  $\boldsymbol{\beta}_\star \in \mathcal{B}_p(R)$  on the event  $E(M_t, \frac{M_t - R}{2})$ . Applying Theorem 3 on the surrogate model, there exists a constant  $\bar{C}_{w,3} = \bar{C}_{w,3}(M_t)$  such that for any  $\varepsilon \in (0, 1/2]$ , we obtain

$$\sup_{\boldsymbol{\beta}_\star \in \mathcal{B}_p(R)} \mathbb{P} \left( \left| f_4(\boldsymbol{\beta}^s) - 2 \left[ \boldsymbol{\beta}_\star^\top (\mathbf{I} - \boldsymbol{\theta}_1)^\top \boldsymbol{\Sigma}_t \boldsymbol{\theta}_1 (\boldsymbol{\Phi}_1 - \mathbf{I}) \boldsymbol{\beta}_\star \right] \right| > \varepsilon \right) \leq \bar{C}_{w,3} p e^{-p\varepsilon^4 / \bar{C}_{w,3}}. \quad (29)$$

By the definition of these functions, we have

$$\mathbb{E}_{\mathbf{g}_t} \left[ f(X_{\kappa_t, \sigma_t^2}^s(\boldsymbol{\Sigma}_t, \boldsymbol{\beta}^s, \mathbf{g}_t)) \right] - \boldsymbol{\beta}_\star^\top (\mathbf{I} - \boldsymbol{\theta}_1)^\top \boldsymbol{\Sigma}_t (\mathbf{I} - \boldsymbol{\theta}_1) \boldsymbol{\beta}_\star = f_2(\boldsymbol{\beta}^s) + f_3(\boldsymbol{\beta}^s) - f_4(\boldsymbol{\beta}^s) \quad (30)$$

By the definition of  $\boldsymbol{\theta}_1$ ,  $\boldsymbol{\theta}_2$ ,  $\boldsymbol{\Phi}_1$ , and  $\boldsymbol{\Phi}_2$ , we have

$$\begin{aligned} \bar{\mathcal{R}}_{\kappa, \sigma}(\dot{\boldsymbol{\Sigma}}, \boldsymbol{\beta}_\star) - \boldsymbol{\beta}_\star^\top (\mathbf{I} - \boldsymbol{\theta}_1)^\top \boldsymbol{\Sigma}_t (\mathbf{I} - \boldsymbol{\theta}_1) \boldsymbol{\beta}_\star &= \boldsymbol{\beta}_\star^\top (\mathbf{I} - \boldsymbol{\Phi}_1)^\top \boldsymbol{\theta}_1^\top \boldsymbol{\Sigma}_t \boldsymbol{\theta}_1 (\mathbf{I} - \boldsymbol{\Phi}_1) \boldsymbol{\beta}_\star + \gamma_s^2(\boldsymbol{\beta}_\star) \mathbb{E}_{\mathbf{g}_s} [\boldsymbol{\Phi}_2^\top \boldsymbol{\theta}_1^\top \boldsymbol{\Sigma}_t \boldsymbol{\theta}_1 \boldsymbol{\Phi}_2] \\ &\quad + \mathbb{E}_{\boldsymbol{\beta}^s \sim X^s} [\gamma_t^2(\boldsymbol{\beta}^s)] \mathbb{E}_{\mathbf{g}_t} [\boldsymbol{\theta}_2^\top \boldsymbol{\Sigma}_t \boldsymbol{\theta}_2] - 2 \left[ \boldsymbol{\beta}_\star^\top (\mathbf{I} - \boldsymbol{\theta}_1)^\top \boldsymbol{\Sigma}_t \boldsymbol{\theta}_1 (\boldsymbol{\Phi}_1 - \mathbf{I}) \boldsymbol{\beta}_\star \right]. \end{aligned} \quad (31)$$

Using (30)-(31) and applying a union bound on (25), (27), (28), and (29), we obtain the advertised claim.  $\square$

**Proposition 10.** Suppose that, for some  $M_t > 1$ ,  $1/M_t \leq \kappa_s$ ,  $\sigma_s^2 \leq M_t$  and  $\|\boldsymbol{\Sigma}_s\|_{op}, \|\boldsymbol{\Sigma}_s^{-1}\|_{op} \leq M_t$ . For every  $c_s > 0$ , there exists an event  $E(M_t, c_s)$  with  $\mathbb{P}((E(M_t, c_s))^c) \leq C_s e^{-p/C_s}$  where  $C_s = C_s(M_t, c_s)$  such that

$$\|\boldsymbol{\beta}^s\|_2 \leq \|\boldsymbol{\beta}_\star\|_2 + c_s \quad \text{and} \quad \|\boldsymbol{\beta}^s - \boldsymbol{\beta}_\star\|_2 \leq \|\boldsymbol{\beta}_\star\|_2 + c_s.$$

*Proof.* By the definition of  $\boldsymbol{\beta}^s$ , we have

$$\begin{aligned} \boldsymbol{\beta}^s &= \tilde{\mathbf{X}}^\top (\tilde{\mathbf{X}} \tilde{\mathbf{X}}^\top)^{-1} \tilde{\mathbf{y}} \\ &= \tilde{\mathbf{X}}^\top (\tilde{\mathbf{X}} \tilde{\mathbf{X}}^\top)^{-1} \tilde{\mathbf{X}} \boldsymbol{\beta}_\star + \tilde{\mathbf{X}}^\top (\tilde{\mathbf{X}} \tilde{\mathbf{X}}^\top)^{-1} \tilde{\mathbf{z}}, \end{aligned} \quad (32)$$

where  $\tilde{\mathbf{z}} \sim \mathcal{N}(\mathbf{0}, \sigma_s^2 \mathbf{I})$ . By triangle inequality, we obtain

$$\begin{aligned} \|\boldsymbol{\beta}^s\|_2 &\leq \|\tilde{\mathbf{X}}^\top (\tilde{\mathbf{X}}\tilde{\mathbf{X}}^\top)^{-1} \tilde{\mathbf{X}}\boldsymbol{\beta}_\star\|_2 + \|\tilde{\mathbf{X}}^\top (\tilde{\mathbf{X}}\tilde{\mathbf{X}}^\top)^{-1} \tilde{\mathbf{z}}\|_2 \\ &\stackrel{(a)}{\leq} \|\boldsymbol{\beta}_\star\|_2 + \|\tilde{\mathbf{X}}^\top (\tilde{\mathbf{X}}\tilde{\mathbf{X}}^\top)^{-1} \tilde{\mathbf{z}}\|_2, \end{aligned} \quad (33)$$

where (a) in above follows from the fact that  $\tilde{\mathbf{X}}^\top (\tilde{\mathbf{X}}\tilde{\mathbf{X}}^\top)^{-1} \tilde{\mathbf{X}}$  is a projection matrix, and so all of its eigenvalues are either 0 or 1. Focusing on the second term of the RHS, we derive

$$\begin{aligned} \|\tilde{\mathbf{X}}^\top (\tilde{\mathbf{X}}\tilde{\mathbf{X}}^\top)^{-1} \tilde{\mathbf{z}}\|_2^2 &= \tilde{\mathbf{z}}^\top (\tilde{\mathbf{X}}\tilde{\mathbf{X}}^\top)^{-1} \tilde{\mathbf{z}} = \frac{\tilde{\mathbf{z}}^\top}{\sqrt{p}} \left( \frac{\tilde{\mathbf{X}}\tilde{\mathbf{X}}^\top}{p} \right)^{-1} \frac{\tilde{\mathbf{z}}}{\sqrt{p}} \\ &\stackrel{(a)}{\leq} \frac{\tilde{\mathbf{z}}^\top \tilde{\mathbf{z}}}{p} \left\| \left( \frac{\tilde{\mathbf{X}}\tilde{\mathbf{X}}^\top}{p} \right)^{-1} \right\|_{\text{op}}, \end{aligned} \quad (34)$$

where (a) in the above inequality follows from Cauchy-Schwarz inequality. Using Bernstein's inequality, there exists an absolute constant  $C_0 > 0$  that depends on  $\sigma_s^2$  such that

$$\mathbb{P} \left( \frac{\tilde{\mathbf{z}}^\top \tilde{\mathbf{z}}}{p} - \sigma_s^2 > t \right) \leq \exp \left\{ -c \min \left\{ \frac{pt^2}{4C_0^2}, \frac{pt}{2C_0} \right\} \right\}.$$

On the other hand, let  $\tilde{\mathbf{Z}} = \tilde{\mathbf{X}}\boldsymbol{\Sigma}_s^{-1/2}$ , which means that the entries of  $\tilde{\mathbf{Z}}$  are independent and normally distributed with zero mean and unit variance. Then,

$$\left\| \left( \frac{\tilde{\mathbf{X}}\tilde{\mathbf{X}}^\top}{p} \right)^{-1} \right\|_{\text{op}} = \left\| \left( \frac{\tilde{\mathbf{Z}}\boldsymbol{\Sigma}_s\tilde{\mathbf{Z}}^\top}{p} \right)^{-1} \right\|_{\text{op}} \leq \|\boldsymbol{\Sigma}_s^{-1}\|_{\text{op}} \left\| \left( \frac{\tilde{\mathbf{Z}}\tilde{\mathbf{Z}}^\top}{p} \right)^{-1} \right\|_{\text{op}}. \quad (35)$$

Using Theorem 1.1 in [Rudelson & Vershynin \(2009\)](#), there exist absolute constants  $C_1, C_2 > 0$  such that we have the following for every  $\varepsilon > 0$

$$\mathbb{P} \left( \left\| \left( \frac{\tilde{\mathbf{Z}}\tilde{\mathbf{Z}}^\top}{p} \right)^{-1} \right\|_{\text{op}} \leq \varepsilon^2 \left( 1 - \frac{1}{\kappa_s} \right)^2 \right) \leq (C_1\varepsilon)^{p-m+1} + e^{-pC_2}. \quad (36)$$

By combining (34), (35), and (36), we obtain that

$$\begin{aligned} \mathbb{P} \left( \|\boldsymbol{\beta}^s\|_2 \leq \|\boldsymbol{\beta}_\star\|_2 + \varepsilon \left( 1 - \frac{1}{\kappa_s} \right) \sqrt{(t + \sigma_s^2) \|\boldsymbol{\Sigma}_s^{-1}\|_{\text{op}}} \right) \\ \leq (C_1\varepsilon)^{p-m+1} + e^{-pC_2} + e^{-c \min \left\{ \frac{pt^2}{4C_0^2}, \frac{pt}{2C_0} \right\}} \end{aligned}$$

The advertised claim for  $\|\boldsymbol{\beta}^s\|_2$  follows when  $\varepsilon$  is selected as  $\varepsilon < \frac{1}{C_1 e}$ . For  $\|\boldsymbol{\beta}^s - \boldsymbol{\beta}_\star\|_2$ , using the definition of  $\boldsymbol{\beta}^s$ , we write as follows:

$$\begin{aligned} \|\boldsymbol{\beta}^s - \boldsymbol{\beta}_\star\|_2 &= \|\tilde{\mathbf{X}}^\top (\tilde{\mathbf{X}}\tilde{\mathbf{X}}^\top)^{-1} \tilde{\mathbf{X}}\boldsymbol{\beta}_\star + \tilde{\mathbf{X}}^\top (\tilde{\mathbf{X}}\tilde{\mathbf{X}}^\top)^{-1} \tilde{\mathbf{z}} - \boldsymbol{\beta}_\star\|_2 \\ &\leq \|\tilde{\mathbf{X}}^\top (\tilde{\mathbf{X}}\tilde{\mathbf{X}}^\top)^{-1} \tilde{\mathbf{X}} - \mathbf{I}\|_2 \|\boldsymbol{\beta}_\star\|_2 + \|\tilde{\mathbf{X}}^\top (\tilde{\mathbf{X}}\tilde{\mathbf{X}}^\top)^{-1} \tilde{\mathbf{z}}\|_2 \\ &\stackrel{(a)}{\leq} \|\boldsymbol{\beta}_\star\|_2 + \|\tilde{\mathbf{X}}^\top (\tilde{\mathbf{X}}\tilde{\mathbf{X}}^\top)^{-1} \tilde{\mathbf{z}}\|_2, \end{aligned} \quad (37)$$

where (a) in the above inequalities follows from the fact that the eigenvalues of  $\tilde{\mathbf{X}}^\top (\tilde{\mathbf{X}}\tilde{\mathbf{X}}^\top)^{-1} \tilde{\mathbf{X}} - \mathbf{I}$  are either 1 or 0 as the eigenvalues of  $\tilde{\mathbf{X}}^\top (\tilde{\mathbf{X}}\tilde{\mathbf{X}}^\top)^{-1} \tilde{\mathbf{X}}$  are either 1 or 0. The remaining part of this proof is identical to the previous part.  $\square$

**Corollary 2.** Suppose that  $\boldsymbol{\beta}^s \in \mathbb{R}^p$  is given, and for some  $M_t > 1$ , we have  $1/M_t \leq \kappa_t, \sigma_t^2 \leq M_t$  and  $\|\boldsymbol{\Sigma}_t\|_{\text{op}}, \|\boldsymbol{\Sigma}_t^{-1}\|_{\text{op}} \leq M_t$ . For every  $c_t > 0$ , there exists an event  $E(M_t, c_t)$  with  $\mathbb{P}((E(M_t, c_t))^c) \leq C_t e^{-p/C_t}$  where  $C_t = C_t(M_t, c_t)$  such that

$$\|\boldsymbol{\beta}^{s2t}\|_2 \leq \|\boldsymbol{\beta}^s\|_2 + c_t \quad \text{and} \quad \|\boldsymbol{\beta}^{s2t} - \boldsymbol{\beta}^s\|_2 \leq \|\boldsymbol{\beta}^s\|_2 + c_t.$$



1428 *Proof.* The result directly follows from the proof of Proposition 10.  $\square$

1429  
1430 **Proposition 11.** Suppose that, for some  $M_t > 1$ ,  $1/M_t \leq \kappa_t$ ,  $\sigma_t^2 \leq M_t$  and  $\|\Sigma_t\|_{\text{op}}, \|\Sigma_t^{-1}\|_{\text{op}} \leq M_t$ . For every  
1431  $c_t > 0$ , there exists an event  $E(M_t, c_t)$  with  $\mathbb{P}((E(M_t, c_t))^c) \leq C_t e^{-p/C_t}$  where  $C_t = C_t(M_t, c_t)$  such that we have  
1432 the following on this event  $E(M_t, c_t)$ :

$$1433 \quad \|\beta^{s2t}\|_2 \leq \|\beta_\star\|_2 + c_t \quad \text{and} \quad \|\beta^{s2t} - \beta_\star\|_2 \leq \|\beta_\star\|_2 + c_t$$

1434  
1435  
1436 *Proof.* By the definition of  $\beta^{s2t}$ , we have the following:

$$1437 \quad \beta^{s2t} = X(XX^\top)^{-1}X\beta^s + X^\top(XX^\top)^{-1}z \quad (38)$$

1438  
1439 where  $z \sim \mathcal{N}(\mathbf{0}, \sigma_t^2 I)$ . Plugging (32) into (38), we obtain

$$1440 \quad \beta^{s2t} = X(XX^\top)^{-1}X(\tilde{X}^\top(\tilde{X}\tilde{X}^\top)^{-1}\tilde{X}\beta_\star + \tilde{X}^\top(\tilde{X}\tilde{X}^\top)^{-1}\tilde{z}) + X^\top(XX^\top)^{-1}z \quad (39)$$

1441  
1442 Note that  $X(XX^\top)^{-1}X$  and  $\tilde{X}^\top(\tilde{X}\tilde{X}^\top)^{-1}\tilde{X}$  are projection matrices. Multiplication of two projection matrices  
1443 results in a projection matrix. Using the fact that the eigenvalues of a projection matrix are either 1 or 0 in  
1444 (39), we have

$$1445 \quad \|\beta^{s2t}\|_2 \leq \|\beta_\star\|_2 + \|\tilde{X}^\top(\tilde{X}\tilde{X}^\top)^{-1}\tilde{z}\|_2 + \|X^\top(XX^\top)^{-1}z\|_2 \quad (40)$$

1446  
1447 By a similar reasoning used in (34), (35), and (36); there exist absolute constants  $C_0, C_1, C_2, c > 0$  such that  
1448 we have the following for every  $\varepsilon, t > 0$ :

$$1449 \quad \mathbb{P}\left(\|X^\top(XX^\top)^{-1}z\|_2 \leq \varepsilon\left(1 - \frac{1}{\kappa_t}\right)\sqrt{(t + \sigma_t^2)\|\Sigma_t^{-1}\|_{\text{op}}}\right) \\ 1450 \quad \leq (C_1\varepsilon)^{p-n+1} + e^{-pC_2} + e^{-c\min\left\{\frac{pt^2}{4c_0^2}, \frac{pt}{2c_0}\right\}} \quad (41)$$

1451  
1452 Similarly, for every  $\tilde{\varepsilon} > 0$ , there exist absolute constants  $\tilde{C}_0, \tilde{C}_1, \tilde{C}_2, \tilde{c} > 0$  such that we have the following for  
1453 every  $\tilde{\varepsilon}, \tilde{t}$ :

$$1454 \quad \mathbb{P}\left(\|\tilde{X}^\top(\tilde{X}\tilde{X}^\top)^{-1}\tilde{z}\|_2 \leq \tilde{\varepsilon}\left(1 - \frac{1}{\kappa_s}\right)\sqrt{(\tilde{t} + \sigma_s^2)\|\Sigma_s^{-1}\|_{\text{op}}}\right) \\ 1455 \quad \leq (\tilde{C}_1\tilde{\varepsilon})^{p-m+1} + e^{-p\tilde{C}_2} + e^{-\tilde{c}\min\left\{\frac{p\tilde{t}^2}{4\tilde{c}_0^2}, \frac{p\tilde{t}}{2\tilde{c}_0}\right\}} \quad (42)$$

1456  
1457 Note that  $X, z, \tilde{X}$ , and  $\tilde{z}$  are independent of each other. Therefore, we can apply union bound on (41)  
1458 and (42) with selecting  $\varepsilon, t, \tilde{\varepsilon}$ , and  $\tilde{t}$  such that  $\varepsilon < \frac{1}{C_1 e}$ ,  $\frac{c_t}{2} < \varepsilon\left(1 - \frac{1}{\kappa_t}\right)\sqrt{(t + \sigma_t^2)\|\Sigma_t^{-1}\|_{\text{op}}}$ ,  $\tilde{\varepsilon} < \frac{1}{\tilde{C}_1}$ , and  
1459  $\frac{c_t}{2} < \varepsilon\left(1 - \frac{1}{\kappa_s}\right)\sqrt{(\tilde{t} + \sigma_s^2)\|\Sigma_s^{-1}\|_{\text{op}}}$ . As a result, there exists an event  $E$  with  $\mathbb{P}(E^c) \leq C_t(M_t, c_t)$  such that

$$1460 \quad \|\beta^{s2t}\|_2 \leq \|\beta_\star\|_2 + c_t.$$

1461  
1462 Using a similar argument in (37), we derive the following on the same event  $E_1$

$$1463 \quad \|\beta^{s2t} - \beta_\star\|_2 \leq \|\beta_\star\|_2 + c_t.$$

1464  
1465 This completes the proof.  $\square$

1466  
1467  
1468 **Proposition 12.** Let  $g : \mathbb{R}^p \rightarrow \mathbb{R}$  be a function such that

$$1469 \quad g(\beta^s) := \|\Sigma_t^{1/2}(\Sigma_t + \tau_t I)^{-1}\Sigma_t(\beta^s - \beta_\star)\|_2^2$$

1470  
1471 Then, on the same event  $E(M_t, c_s)$  in Proposition 10, the function  $g$  is  $(\|\beta_\star\|_2 + c_s)\frac{2\lambda_1^3}{(\lambda_1 + \tau_t)^2}$ -Lipschitz where  $\lambda_1$   
1472 is the largest eigenvalue of  $\Sigma_t$ .

1479

*Proof.* We take the gradient of the function  $g$ :

1480

1481

$$\|\nabla g(\boldsymbol{\beta}^s)\|_2 = 2\|\boldsymbol{\Sigma}_t(\boldsymbol{\Sigma}_t + \tau_t \mathbf{I})^{-1} \boldsymbol{\Sigma}_t(\boldsymbol{\Sigma}_t + \tau_t \mathbf{I})^{-1} \boldsymbol{\Sigma}_t(\boldsymbol{\beta}^s - \boldsymbol{\beta}_\star)\|_2$$

1482

$$\leq \|\boldsymbol{\beta}^s - \boldsymbol{\beta}_\star\|_2 \max_i \frac{2\lambda_i^3}{(\lambda_i + \tau_t)^2}$$

1484

1485

$$= \|\boldsymbol{\beta}^s - \boldsymbol{\beta}_\star\|_2 \max_i 2\lambda_i \left(1 - \frac{\tau_t}{\lambda_i + \tau_t}\right)^2$$

1486

1487

$$= \|\boldsymbol{\beta}^s - \boldsymbol{\beta}_\star\|_2 \frac{2\lambda_1^3}{(\lambda_1 + \tau_t)^2}.$$

1488

1489

1490

Combining Proposition 10 on the event  $E(M_t, c_s)$  with the above inequality provides the advertised claim.  $\square$

1491

1492

**Proposition 13.** Let  $g : \mathbb{R}^p \rightarrow \mathbb{R}$  be a function such that

1493

$$g(\boldsymbol{\beta}^s) := \frac{1}{p} \|\boldsymbol{\Sigma}_t^{1/2}(\boldsymbol{\Sigma}_t + \tau_t \mathbf{I})^{-1} \boldsymbol{\Sigma}_t^{1/2} \gamma_t(\boldsymbol{\beta}^s)\|_F^2$$

1494

1495

Then, on the same event  $E(M_t, c_s)$  in Proposition 10, the function  $g$  is  $L$ -Lipschitz where  $(\lambda_i)_{i=1}^p$  are the eigenvalues of  $\boldsymbol{\Sigma}_t$  with a descending order and

1496

1497

1498

$$L = \frac{4\tau_t^2}{m} \frac{\lambda_1^3}{(\lambda_1 + \tau_t)^4} \frac{\|\boldsymbol{\beta}_\star\|_2 + c_s}{1 - \frac{1}{m} \sum_{i=1}^p \left(\frac{\lambda_i}{\lambda_i + \tau_t}\right)^2}.$$

1499

1500

1501

1502

*Proof.* We take the gradient of the function  $g$ :

1503

$$\nabla g(\boldsymbol{\beta}^s) = \frac{2}{p} \boldsymbol{\Sigma}_t^{1/2}(\boldsymbol{\Sigma}_t + \tau_t \mathbf{I})^{-1} \boldsymbol{\Sigma}_t(\boldsymbol{\Sigma}_t + \tau_t \mathbf{I})^{-1} \boldsymbol{\Sigma}_t^{1/2} \nabla \gamma_t^2(\boldsymbol{\beta}^s).$$

1504

1505

1506

Note that

1507

$$\begin{aligned} \gamma_t^2(\boldsymbol{\beta}^s) &= \kappa_t \left( \sigma_t^2 + \mathbb{E}_{\boldsymbol{\beta}^{s2t}} [\|\boldsymbol{\Sigma}_t^{1/2}(\boldsymbol{\beta}^{s2t} - \boldsymbol{\beta}^s)\|_2^2] \right) \\ &= \kappa_t \frac{\sigma_t^2 + \tau_t^2 \|(\boldsymbol{\Sigma}_t + \tau_t \mathbf{I})^{-1} \boldsymbol{\Sigma}_t^{1/2} \boldsymbol{\beta}^s\|_2^2}{1 - \frac{1}{m} \text{tr} \left( (\boldsymbol{\Sigma}_t + \tau_t \mathbf{I})^{-2} \boldsymbol{\Sigma}_t^2 \right)}. \end{aligned}$$

1508

1509

1510

1511

1512

Then, we have

1513

$$\nabla \gamma_t^2(\boldsymbol{\beta}^s) = 2\kappa_t \frac{\tau_t^2 \boldsymbol{\Sigma}_t^{1/2}(\boldsymbol{\Sigma}_t + \tau_t \mathbf{I})^{-2} \boldsymbol{\Sigma}_t^{1/2} \boldsymbol{\beta}^s}{1 - \frac{1}{m} \text{tr} \left( (\boldsymbol{\Sigma}_t + \tau_t \mathbf{I})^{-2} \boldsymbol{\Sigma}_t^2 \right)}.$$

1514

1515

1516

1517

Plugging  $\nabla \gamma_t^2(\boldsymbol{\beta}^s)$  into  $\nabla g(\boldsymbol{\beta}^s)$ , we obtain that

1518

$$\begin{aligned} \|\nabla g(\boldsymbol{\beta}^s)\|_2 &= \frac{4\tau_t^2}{m} \frac{\boldsymbol{\Sigma}_t^{1/2}(\boldsymbol{\Sigma}_t + \tau_t \mathbf{I})^{-1} \boldsymbol{\Sigma}_t(\boldsymbol{\Sigma}_t + \tau_t \mathbf{I})^{-2} \boldsymbol{\Sigma}_t(\boldsymbol{\Sigma}_t + \tau_t \mathbf{I})^{-1} \boldsymbol{\Sigma}_t^{1/2} \boldsymbol{\beta}^s}{1 - \frac{1}{m} \text{tr} \left( (\boldsymbol{\Sigma}_t + \tau_t \mathbf{I})^{-2} \boldsymbol{\Sigma}_t^2 \right)} \\ &\leq \frac{4\tau_t^2}{m} \frac{\lambda_1^3}{(\lambda_1 + \tau_t)^4} \frac{\|\boldsymbol{\beta}^s\|_2}{1 - \frac{1}{m} \sum_{i=1}^p \left(\frac{\lambda_i}{\lambda_i + \tau_t}\right)^2}. \end{aligned}$$

1519

1520

1521

1522

1523

1524

Combining Proposition 10 on the event  $E(M_t, c_s)$  with the above inequality provides the advertised claim.  $\square$

1525

1526

**Proposition 14.** Let  $g : \mathbb{R}^p \rightarrow \mathbb{R}$  be a function such that

1527

$$g(\boldsymbol{\beta}^s) := 2\boldsymbol{\beta}_\star^\top \left( \mathbf{I} - (\boldsymbol{\Sigma}_t + \tau_t \mathbf{I})^{-1} \boldsymbol{\Sigma}_t \right)^\top \boldsymbol{\Sigma}_t(\boldsymbol{\Sigma}_t + \tau_t \mathbf{I})^{-1} \boldsymbol{\Sigma}_t(\boldsymbol{\beta}^s - \boldsymbol{\beta}_\star).$$

1528

1529

Then, the function  $g$  is  $2\|\boldsymbol{\beta}_\star\|_2 \tau_t \left(\frac{\lambda_1}{\lambda_1 + \tau_t}\right)^2$ -Lipschitz where  $\lambda_1$  is the largest eigenvalue of  $\boldsymbol{\Sigma}_t$ .

1530  
1531  
1532  
1533  
1534  
1535  
1536  
1537  
1538  
1539  
1540  
1541  
1542  
1543  
1544  
1545  
1546  
1547  
1548  
1549  
1550  
1551  
1552  
1553  
1554  
1555  
1556  
1557  
1558  
1559  
1560  
1561  
1562  
1563  
1564  
1565  
1566  
1567  
1568  
1569  
1570  
1571  
1572  
1573  
1574  
1575  
1576  
1577  
1578  
1579  
1580

*Proof.* We take the gradient of the function  $g$ :

$$\begin{aligned} \|\nabla g(\boldsymbol{\beta}^s)\|_2 &= 2\|\boldsymbol{\Sigma}_t(\boldsymbol{\Sigma}_t + \tau_t \mathbf{I})^{-1} \boldsymbol{\Sigma}_t (\mathbf{I} - (\boldsymbol{\Sigma}_t + \tau_t \mathbf{I})^{-1} \boldsymbol{\Sigma}_t) \boldsymbol{\beta}_\star\|_2 \\ &\leq 2\|\boldsymbol{\beta}_\star\|_2 \tau_t \max_i \left(1 - \frac{\tau_t}{\lambda_i + \tau_t}\right)^2 \\ &= 2\|\boldsymbol{\beta}_\star\|_2 \tau_t \left(\frac{\lambda_1}{\lambda_1 + \tau_t}\right)^2, \end{aligned}$$

and the desired result readily follows.  $\square$

**Lemma 1.** *We have that*

$$\begin{aligned} \mathbb{E}_{\boldsymbol{\beta}^s \sim X_{\kappa_s, \sigma_s^2}^s} [\gamma_t^2(\boldsymbol{\beta}^s)] &= \kappa_t \frac{\sigma_t^2 + \tau_t^2 \|(\boldsymbol{\Sigma}_t + \tau_t \mathbf{I})^{-1} \boldsymbol{\Sigma}_t^{1/2} ((\boldsymbol{\Sigma}_s + \tau_s \mathbf{I})^{-1} \boldsymbol{\Sigma}_s \boldsymbol{\beta}_\star)\|_2^2}{1 - \frac{1}{n} \text{tr}((\boldsymbol{\Sigma}_t + \tau_t \mathbf{I})^{-2} \boldsymbol{\Sigma}_t^2)} \\ &\quad + \frac{\kappa_t \tau_t^2 \gamma_s^2(\boldsymbol{\beta}_\star) \text{tr}(\boldsymbol{\Sigma}_s^{1/2} (\boldsymbol{\Sigma}_s + \tau_s \mathbf{I})^{-1} \boldsymbol{\Sigma}_t^{1/2} (\boldsymbol{\Sigma}_t + \tau_t \mathbf{I})^{-2} \boldsymbol{\Sigma}_t^{1/2} (\boldsymbol{\Sigma}_s + \tau_s \mathbf{I})^{-1} \boldsymbol{\Sigma}_s^{1/2})}{p \left(1 - \frac{1}{n} \text{tr}((\boldsymbol{\Sigma}_t + \tau_t \mathbf{I})^{-2} \boldsymbol{\Sigma}_t^2)\right)}. \end{aligned}$$

*Proof.* The desired claim follows from the following manipulations using the definition of  $X_{\kappa_s, \sigma_s^2}^s$  in (13):

$$\begin{aligned} \mathbb{E}_{\boldsymbol{\beta}^s \sim X_{\kappa_s, \sigma_s^2}^s} [\gamma_t^2(\boldsymbol{\beta}^s)] &= \mathbb{E}_{\boldsymbol{\beta}^s \sim X_{\kappa_s, \sigma_s^2}^s} \left[ \kappa_t \frac{\sigma_t^2 + \tau_t^2 \|(\boldsymbol{\Sigma}_t + \tau_t \mathbf{I})^{-1} \boldsymbol{\Sigma}_t^{1/2} \boldsymbol{\beta}^s\|_2^2}{1 - \frac{1}{n} \text{tr}((\boldsymbol{\Sigma}_t + \tau_t \mathbf{I})^{-2} \boldsymbol{\Sigma}_t^2)} \right] \\ &= \mathbb{E}_{\mathbf{g}_s} \left[ \kappa_t \frac{\sigma_t^2 + \tau_t^2 \|(\boldsymbol{\Sigma}_t + \tau_t \mathbf{I})^{-1} \boldsymbol{\Sigma}_t^{1/2} ((\boldsymbol{\Sigma}_s + \tau_s \mathbf{I})^{-1} \boldsymbol{\Sigma}_s \boldsymbol{\beta}_\star + (\boldsymbol{\Sigma}_s + \tau_s \mathbf{I})^{-1} \boldsymbol{\Sigma}_s^{1/2} \gamma_s(\boldsymbol{\beta}_\star) \mathbf{g}_s / \sqrt{p})\|_2^2}{1 - \frac{1}{n} \text{tr}((\boldsymbol{\Sigma}_t + \tau_t \mathbf{I})^{-2} \boldsymbol{\Sigma}_t^2)} \right] \\ &= \kappa_t \frac{\sigma_t^2 + \tau_t^2 \|(\boldsymbol{\Sigma}_t + \tau_t \mathbf{I})^{-1} \boldsymbol{\Sigma}_t^{1/2} ((\boldsymbol{\Sigma}_s + \tau_s \mathbf{I})^{-1} \boldsymbol{\Sigma}_s \boldsymbol{\beta}_\star)\|_2^2}{1 - \frac{1}{n} \text{tr}((\boldsymbol{\Sigma}_t + \tau_t \mathbf{I})^{-2} \boldsymbol{\Sigma}_t^2)} \\ &\quad + \frac{\kappa_t \tau_t^2 \gamma_s^2(\boldsymbol{\beta}_\star) \text{tr}(\boldsymbol{\Sigma}_s^{1/2} (\boldsymbol{\Sigma}_s + \tau_s \mathbf{I})^{-1} \boldsymbol{\Sigma}_t^{1/2} (\boldsymbol{\Sigma}_t + \tau_t \mathbf{I})^{-2} \boldsymbol{\Sigma}_t^{1/2} (\boldsymbol{\Sigma}_s + \tau_s \mathbf{I})^{-1} \boldsymbol{\Sigma}_s^{1/2})}{p \left(1 - \frac{1}{n} \text{tr}((\boldsymbol{\Sigma}_t + \tau_t \mathbf{I})^{-2} \boldsymbol{\Sigma}_t^2)\right)}. \end{aligned}$$

$\square$
